# Supplementary material for: Microwave-assisted synthesis of 2,3-dihydropyrido[2,3-d]pyrimidin-4(1H)-ones catalyzed by DBU in aqueous medium
Source: Royal Society of Chemistry journal article supplement (doi:10.1039/c2gc16469h), 2012-01-01

# Microwave-assisted synthesis of 2,3-dihydropyrido[2,3-*d*]pyrimidin-4(1*H*)-ones catalyzed by DBU in aqueous medium

Liupan Yang, Daxin Shi, Shu Chen, Hongxin Chai, Danfei Huang, Qi Zhang and Jiarong Li\*

School of Chemical Engineering and Environment, Beijing Institute of Technology, Beijing, 100081, China, Fax: +86(10)68918012; E-mail: jrli@bit.edu.cn

## SUPPORTING INFORMATION

### Contents

#### A. ORTEP diagram of 3a, 4b,4e

#### B. All NMR Spectra for the New Compounds

##### A. ORTEP diagram of 3a, 4b, 4e.

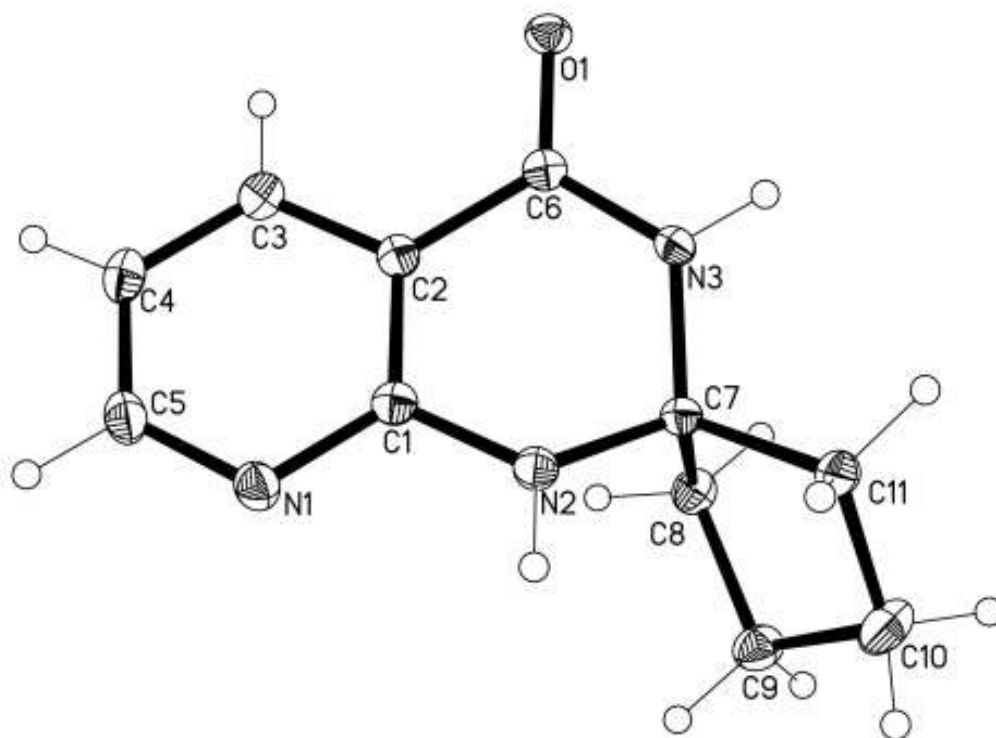

Fig. 1 ORTEP diagram of 3a

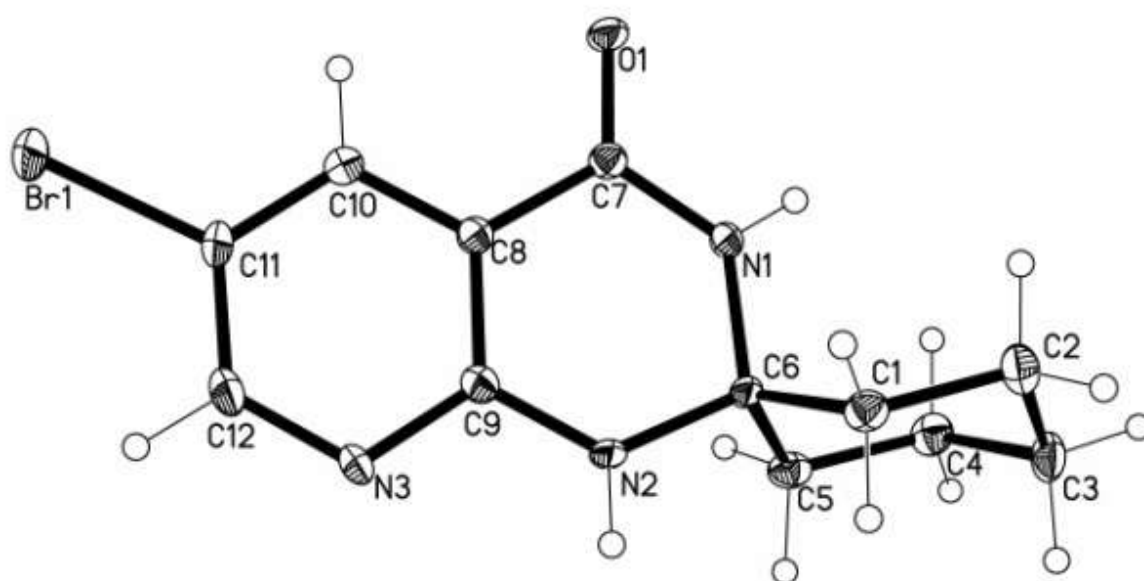

**Fig. 2** ORTEP diagram of 4b

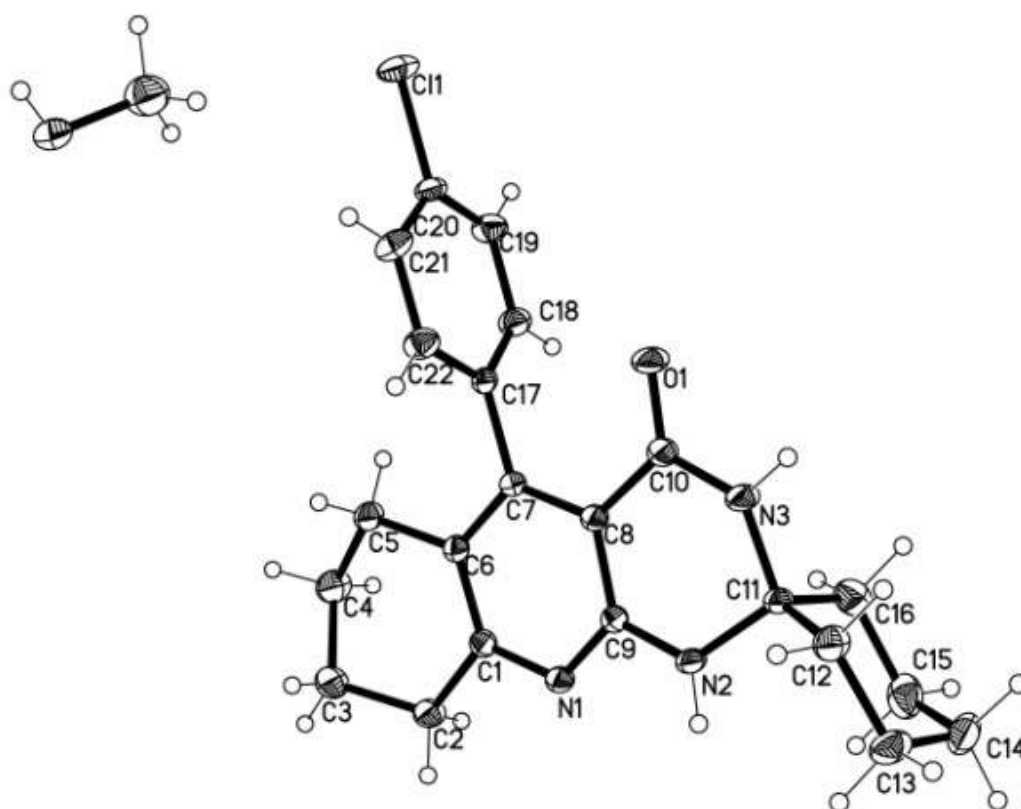

**Fig. 3** ORTEP diagram of 4e

B. All NMR Spectra for the New Compounds

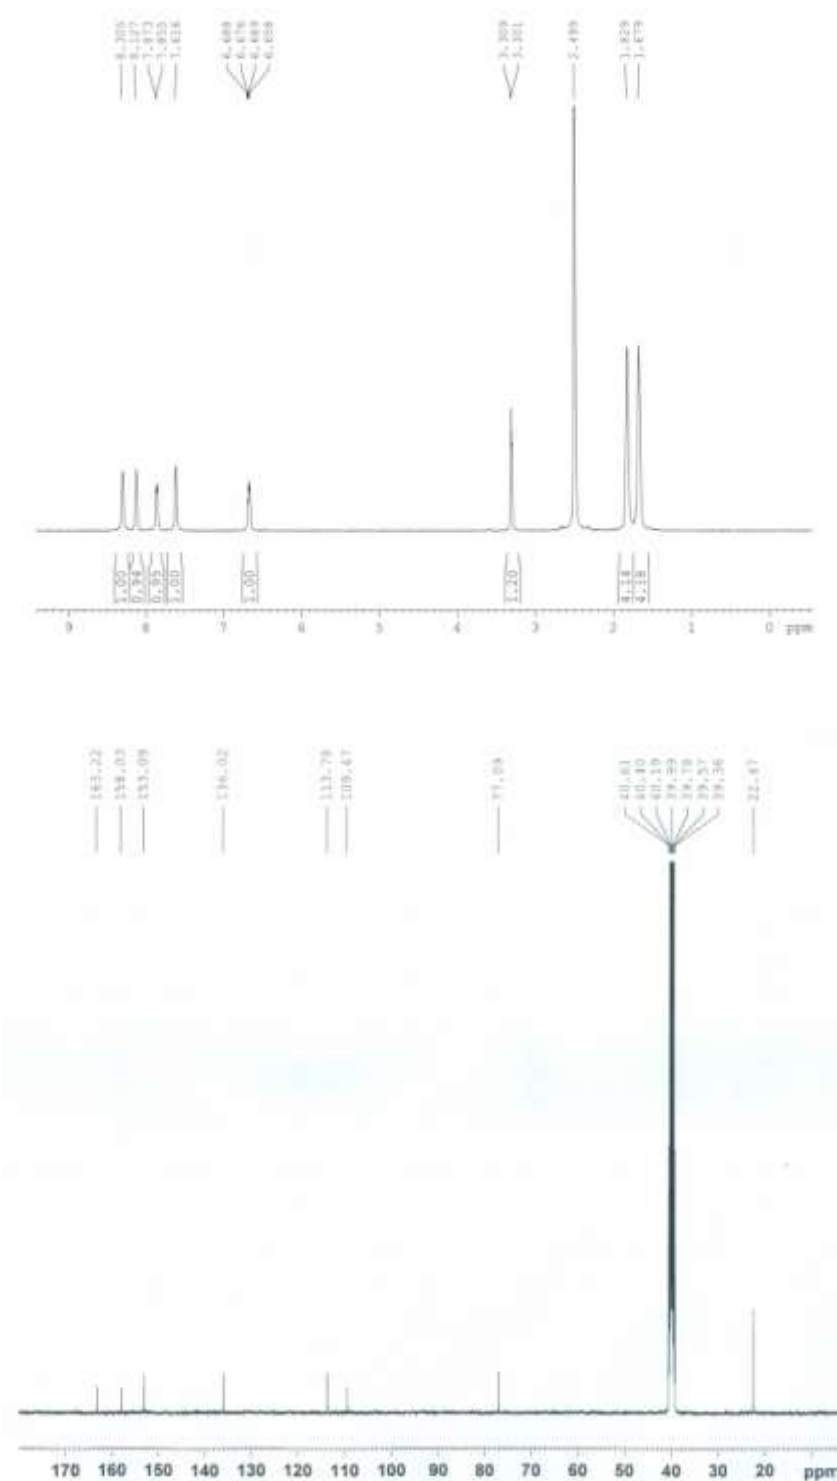

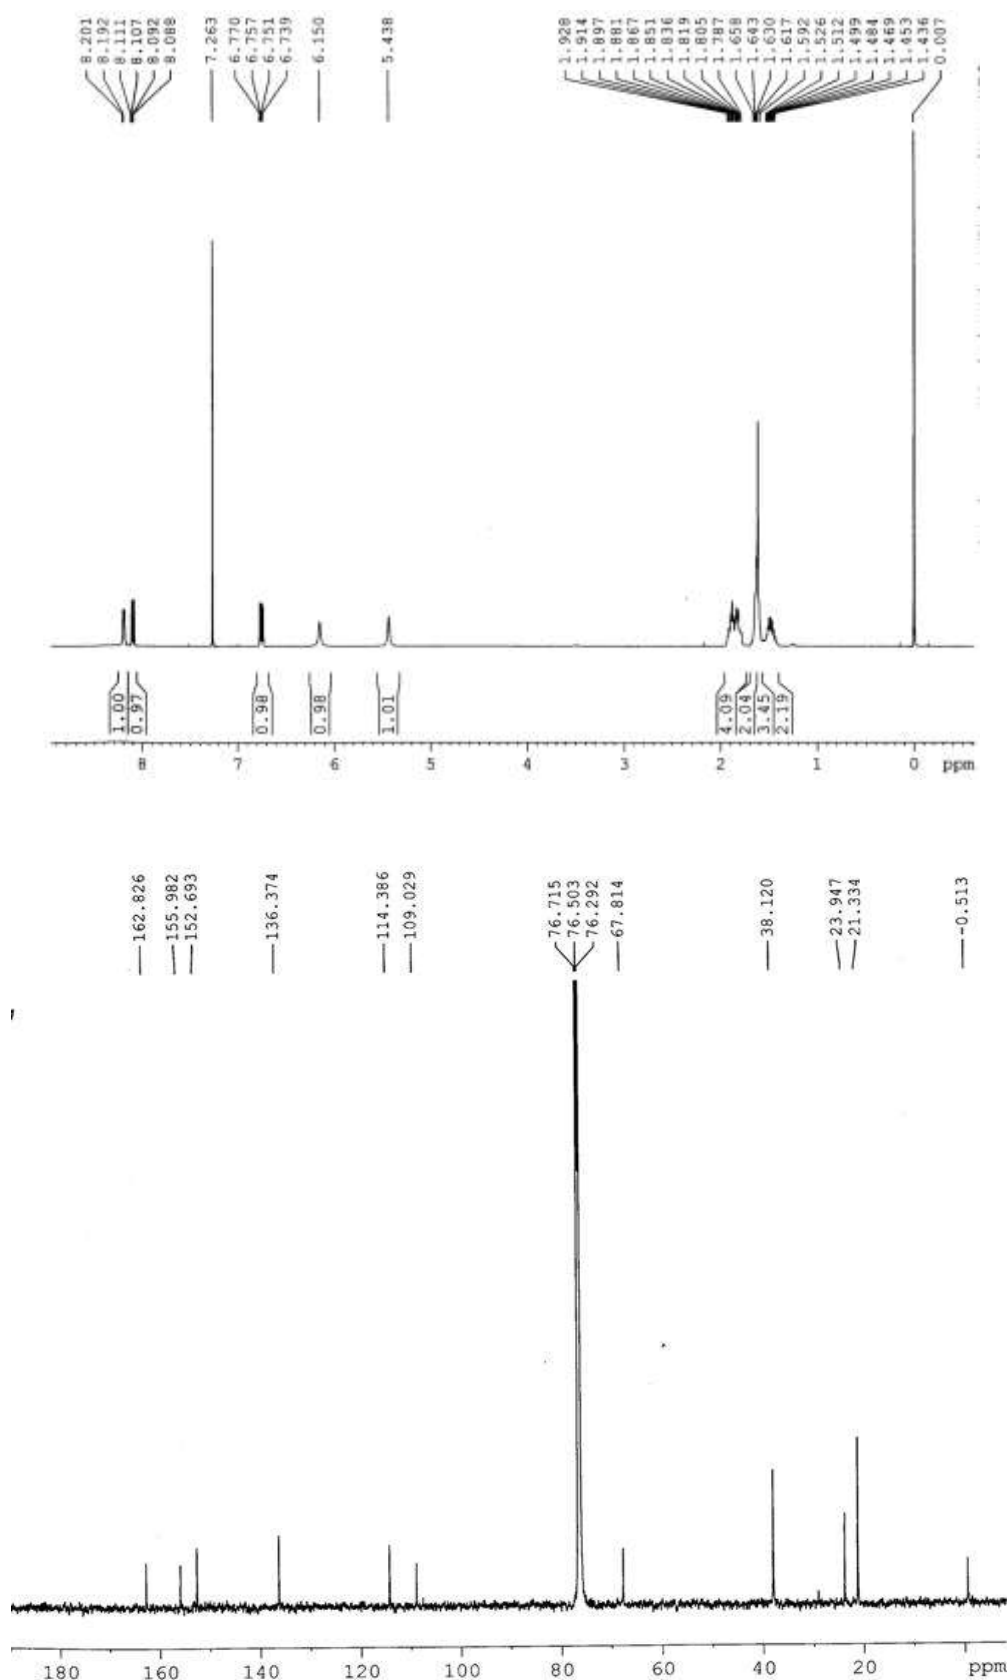

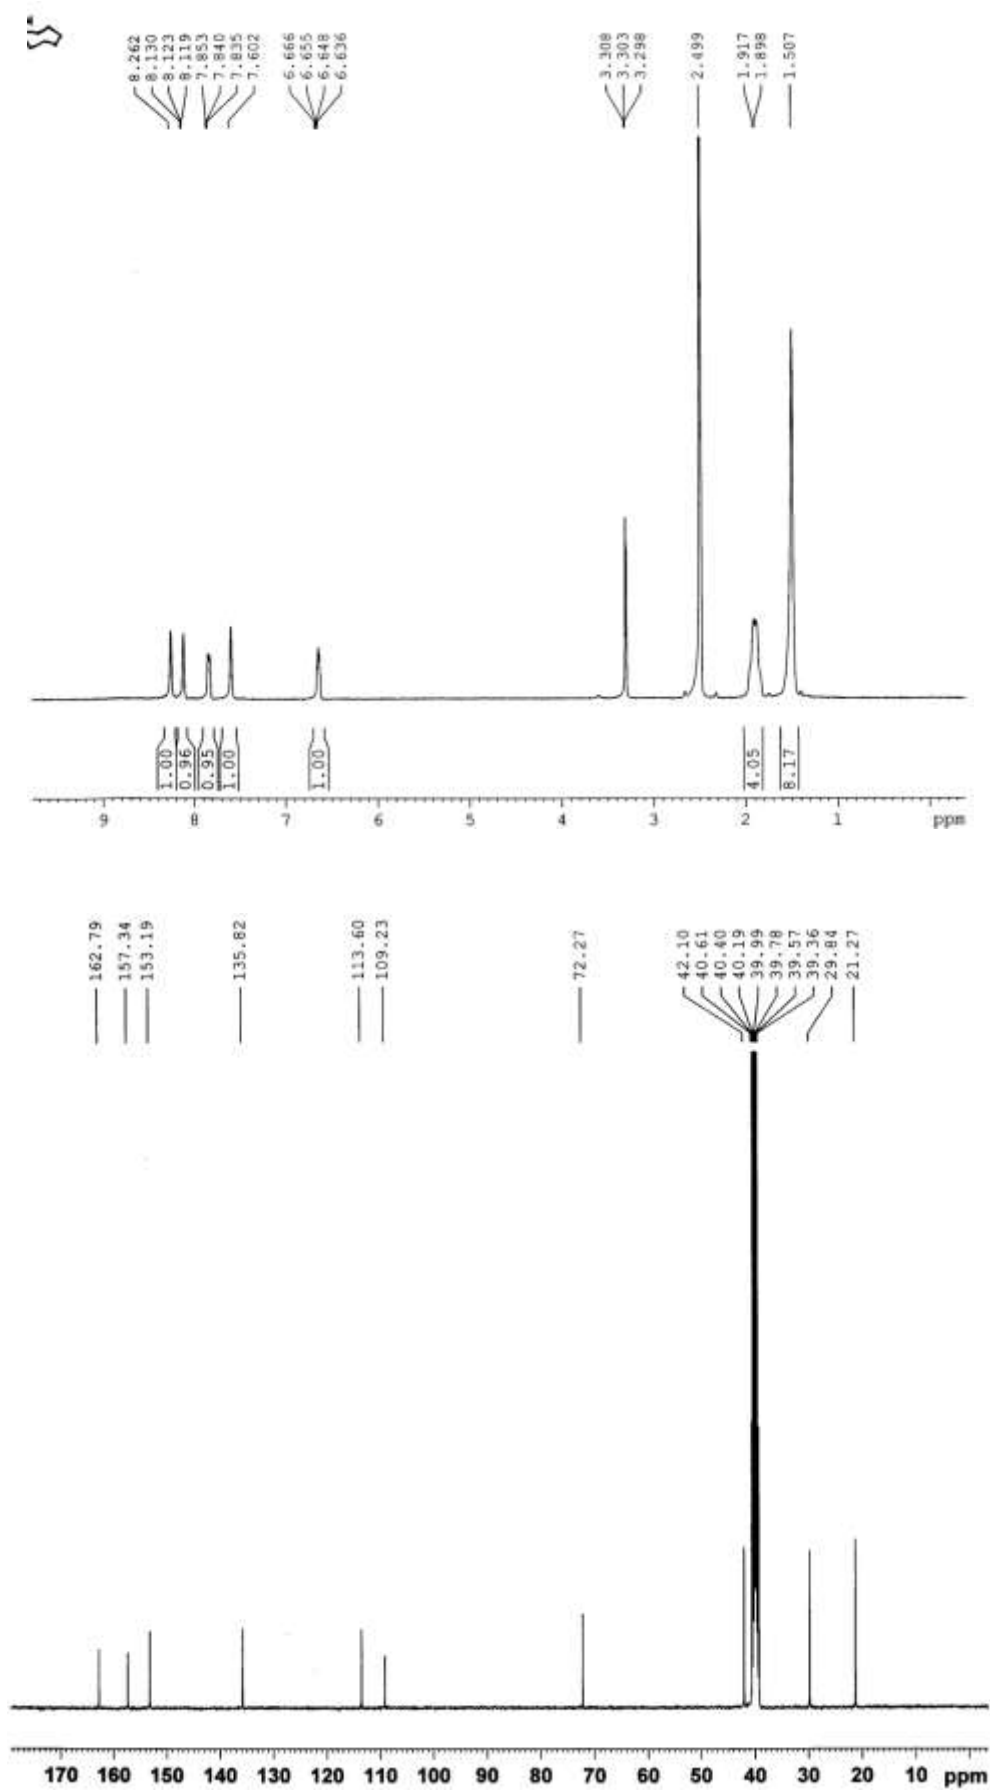

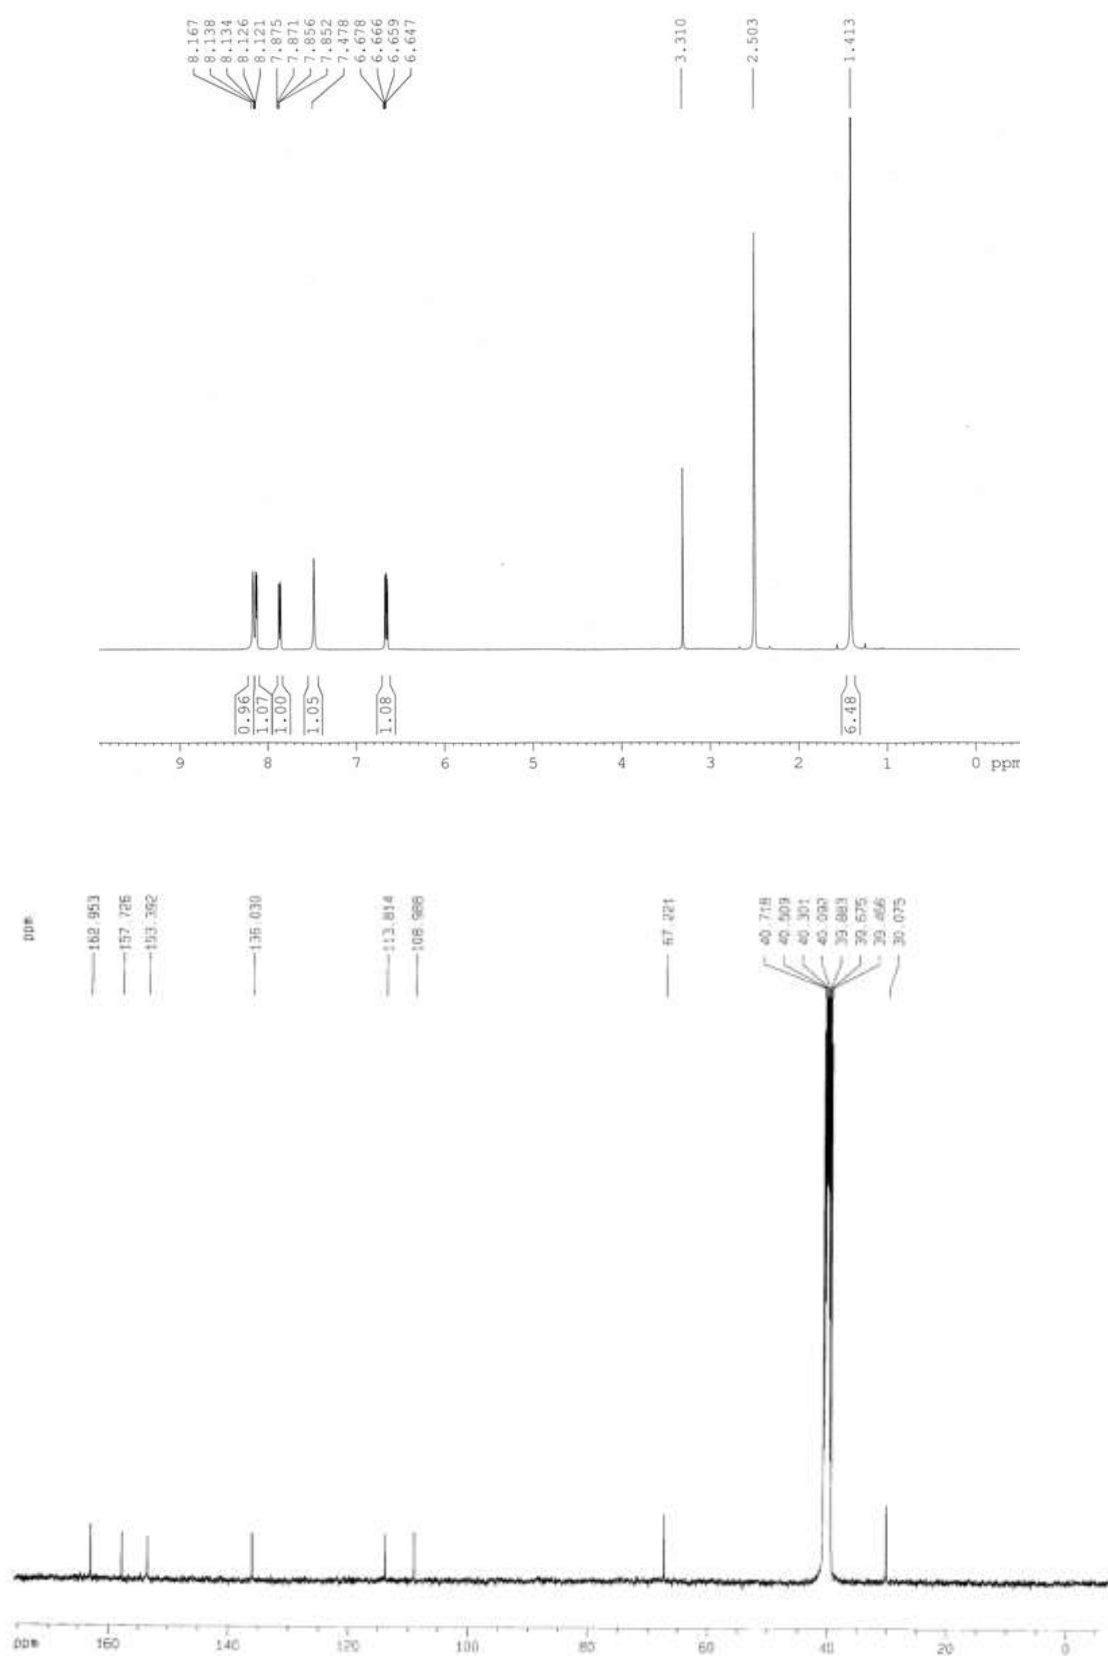

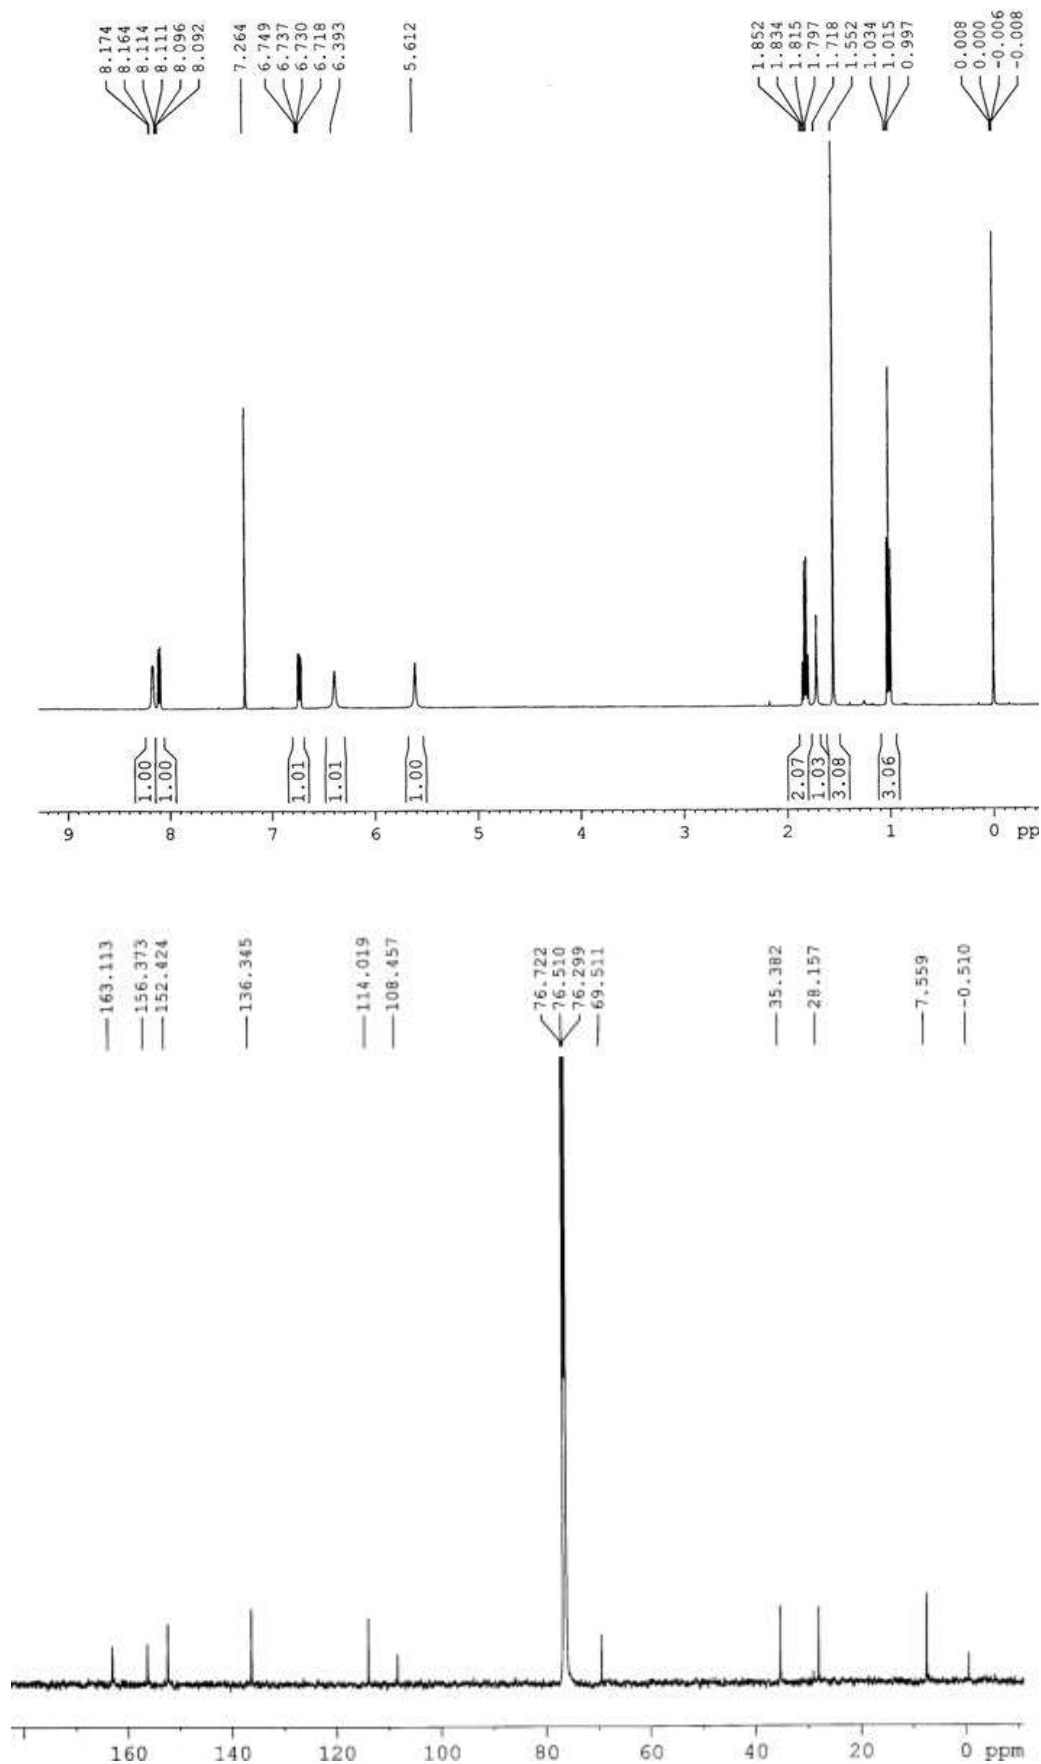

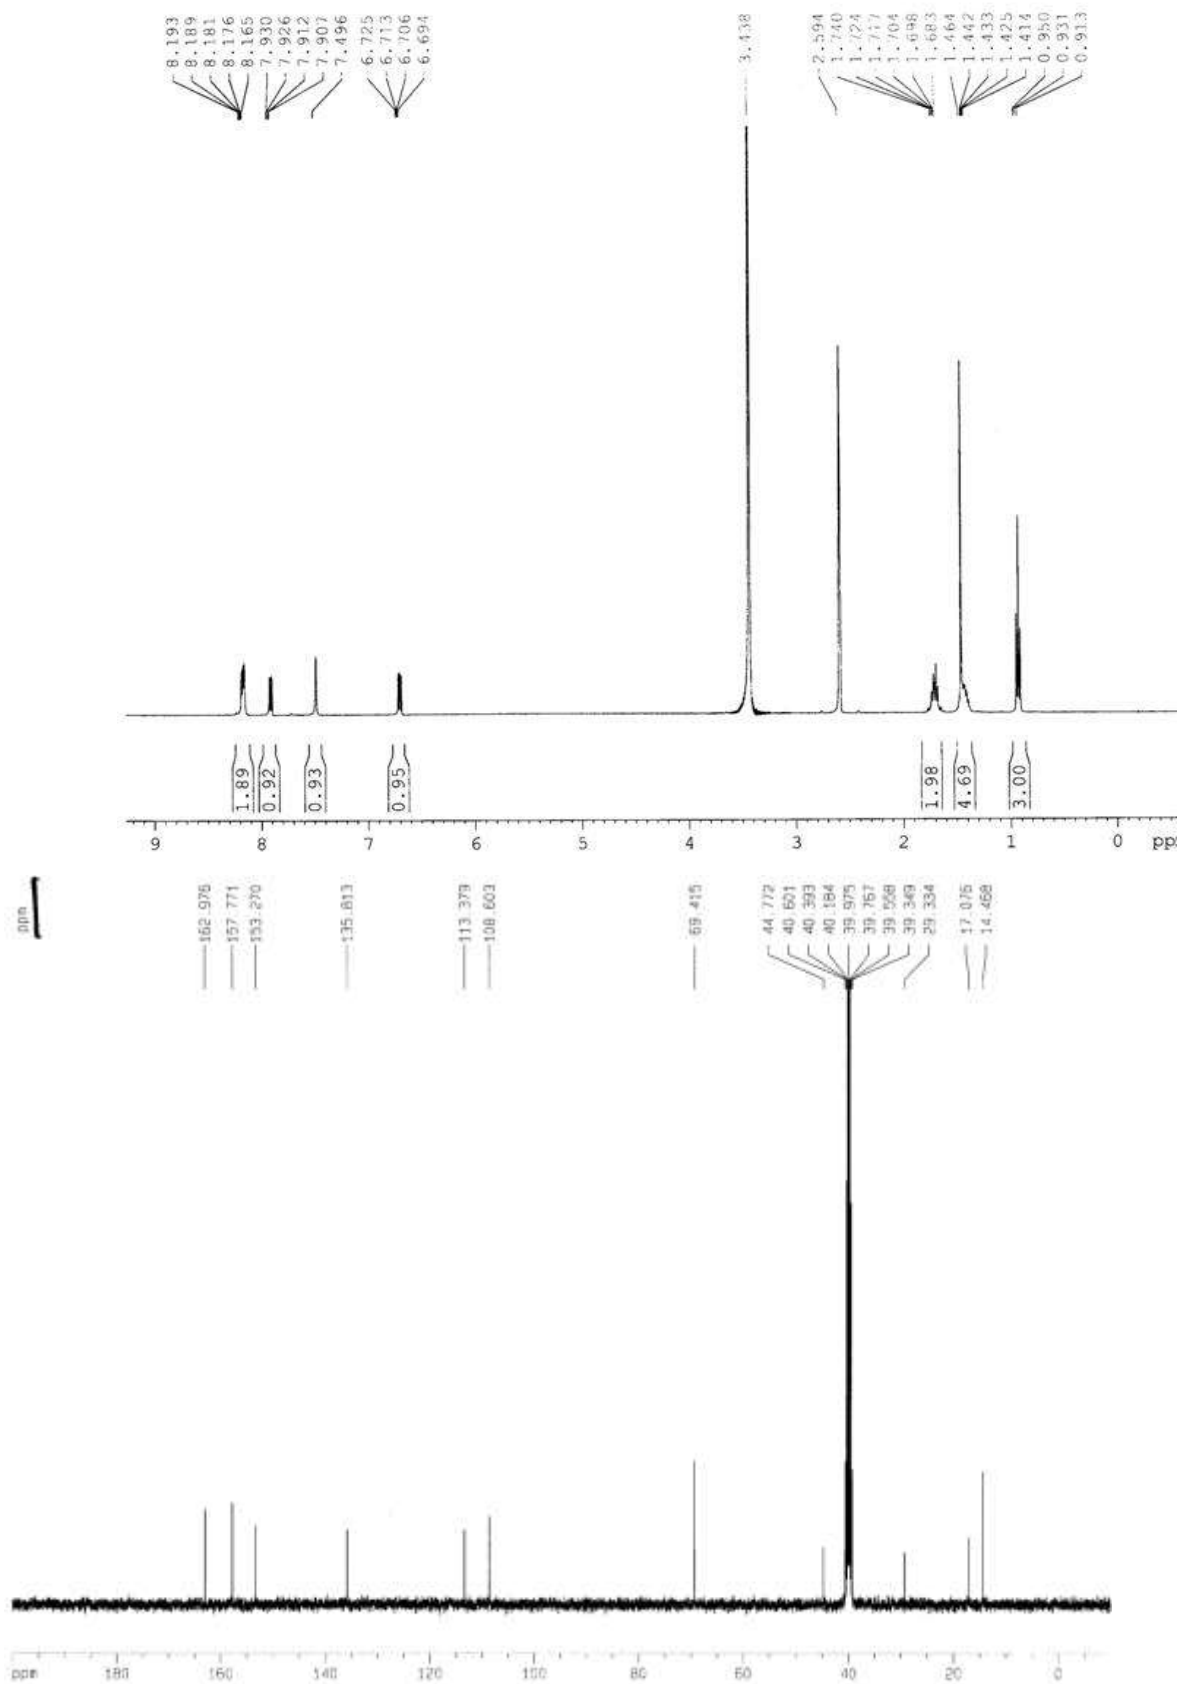



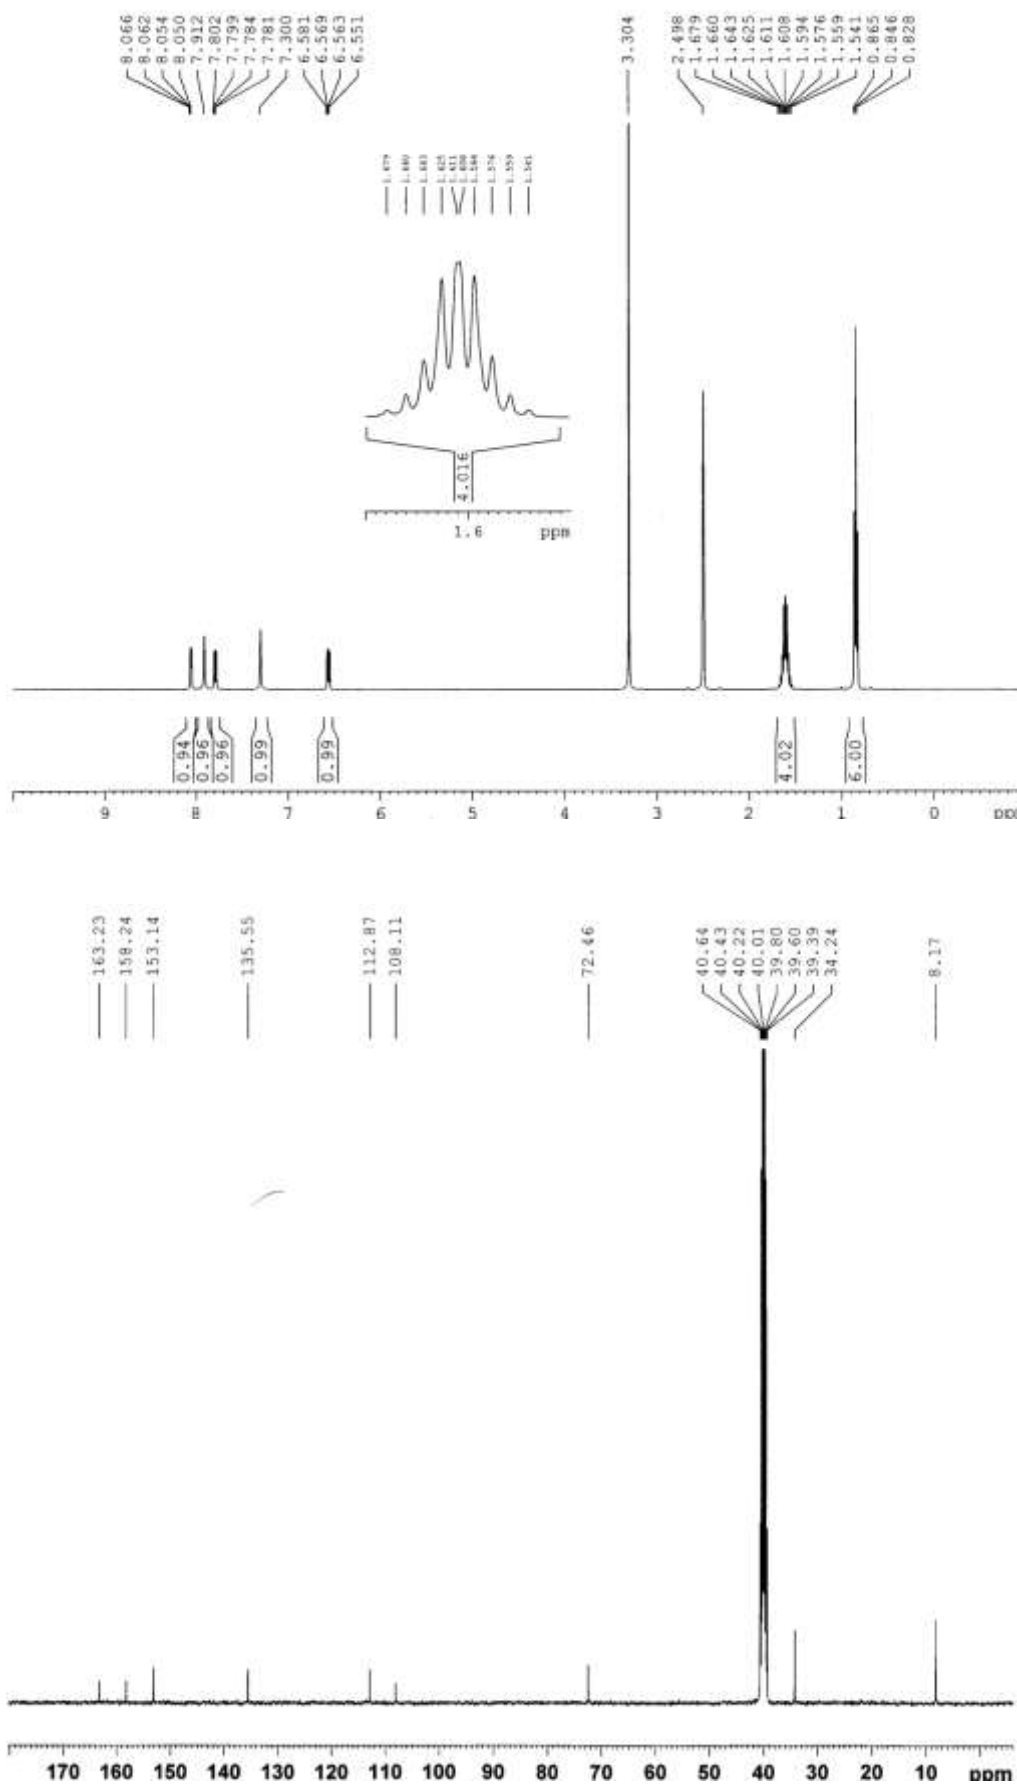

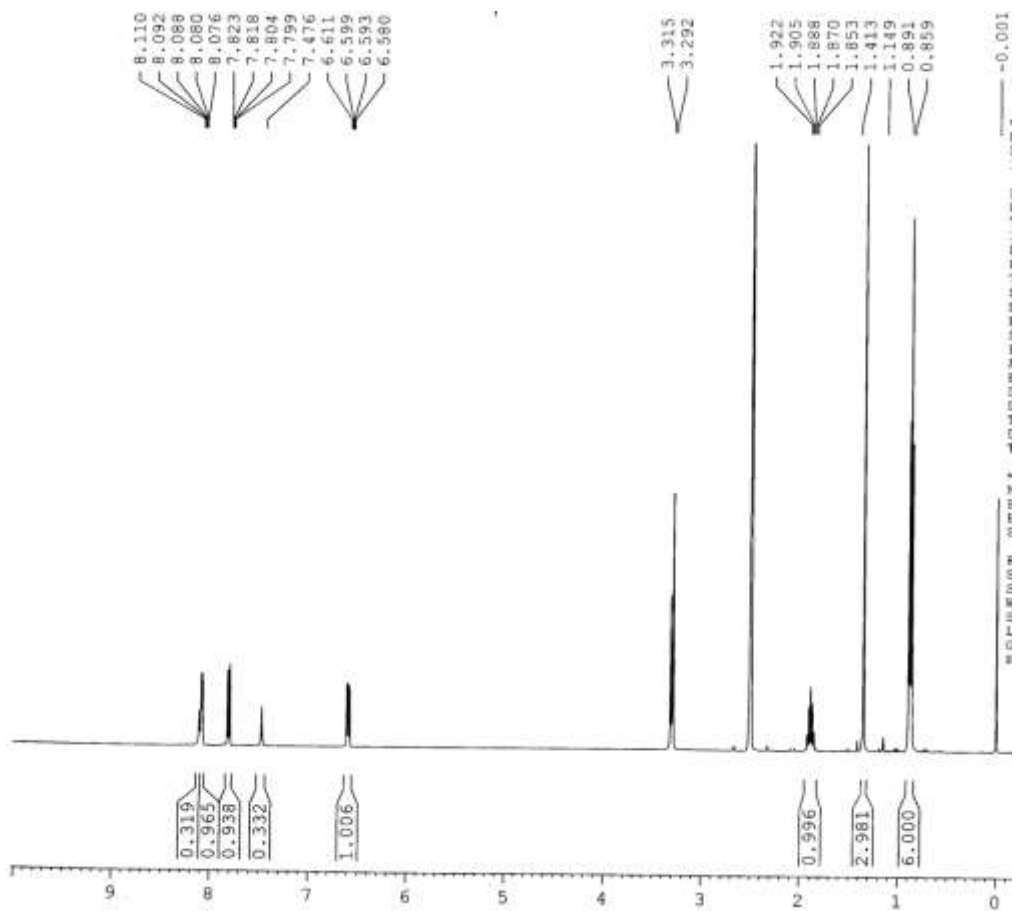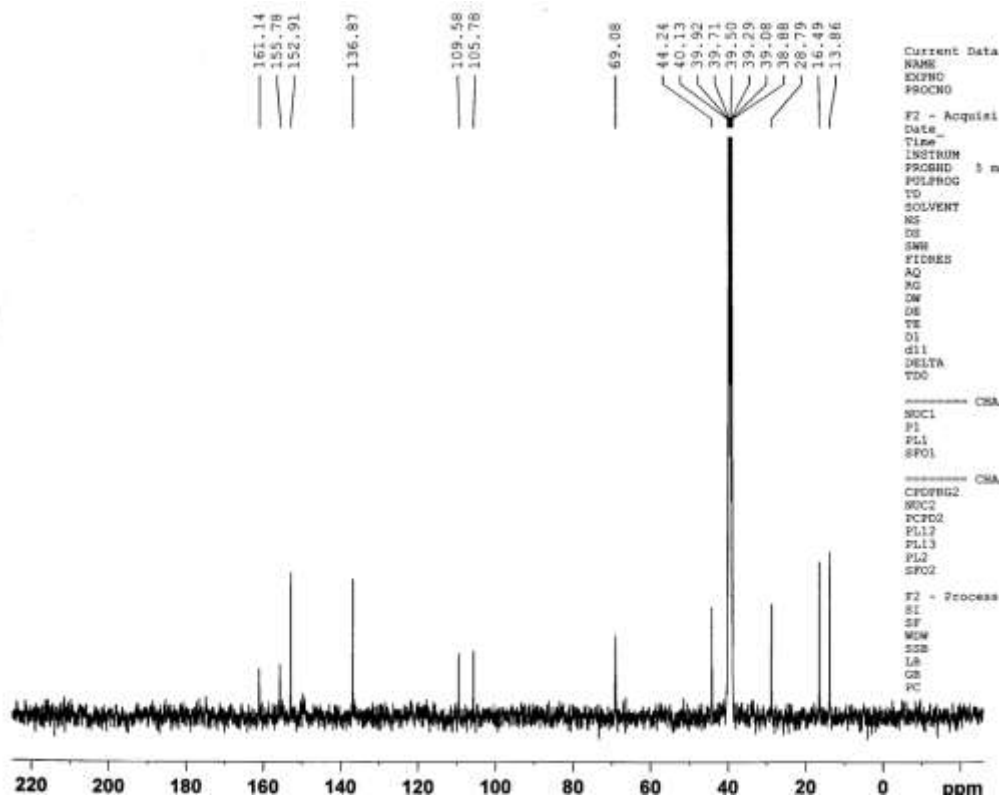

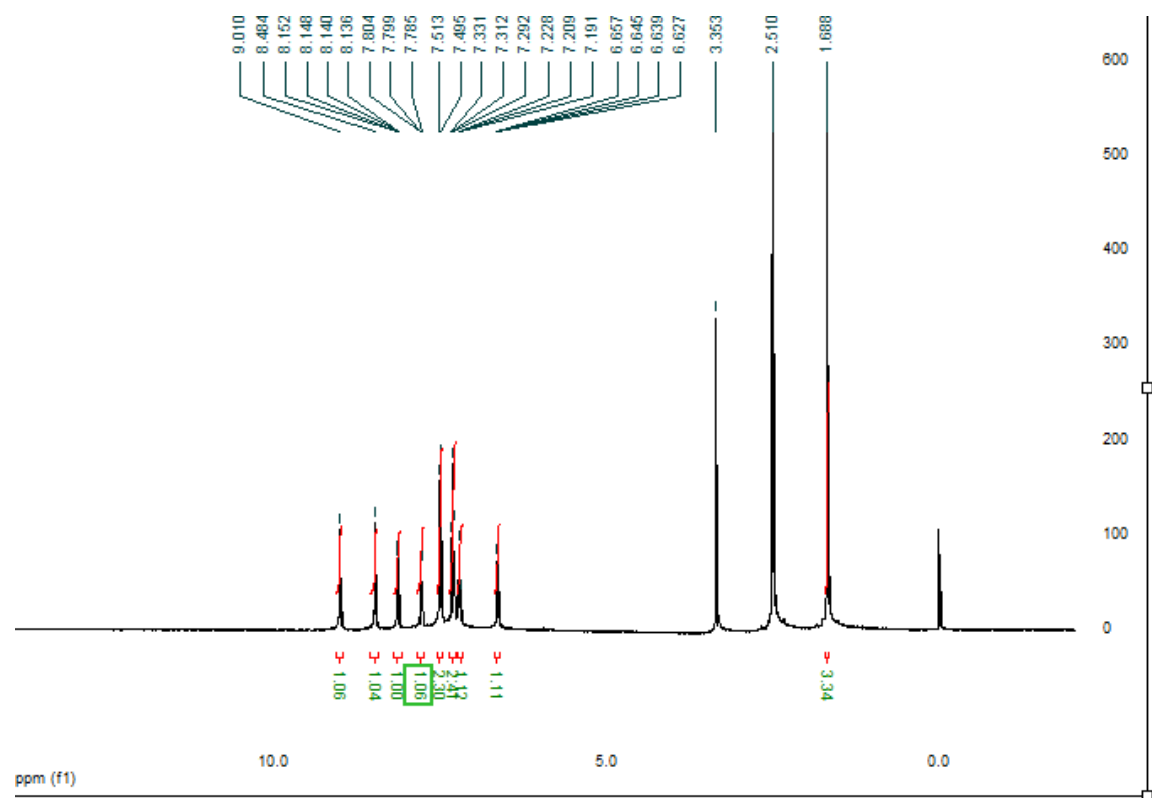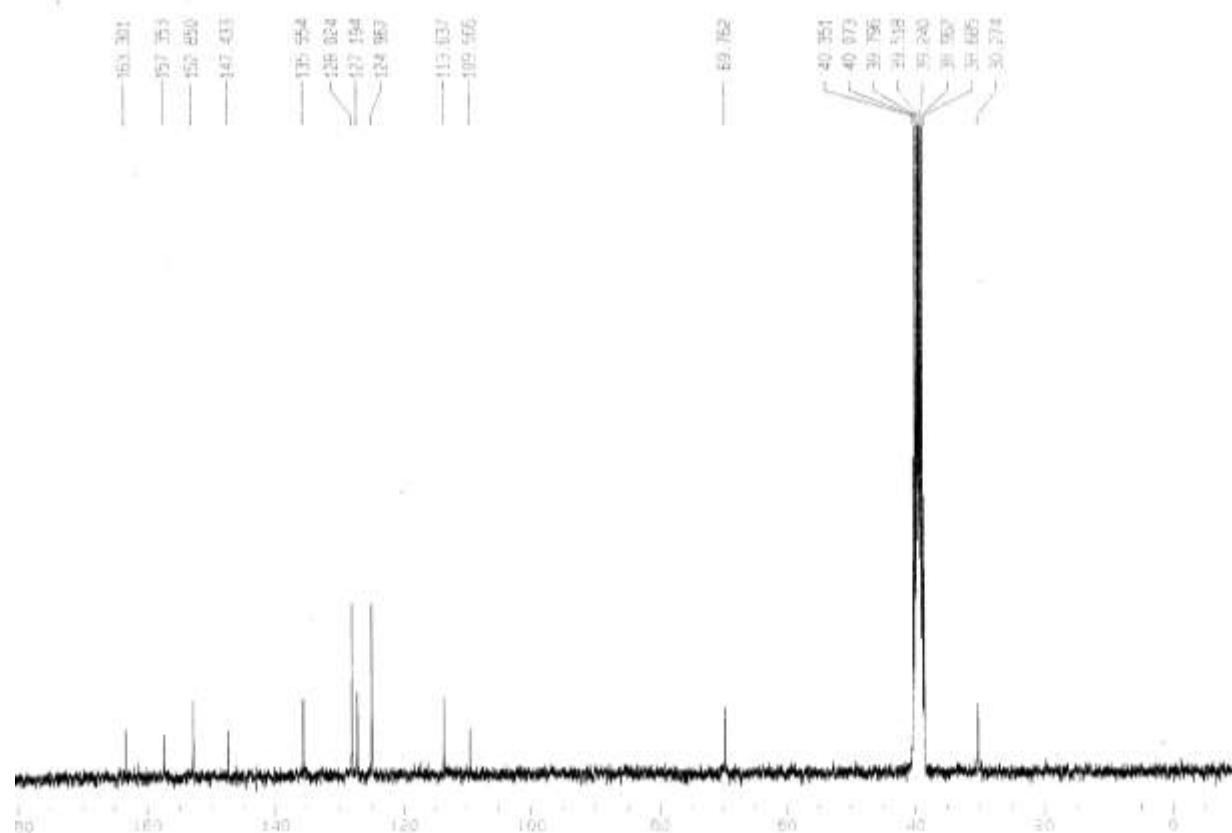

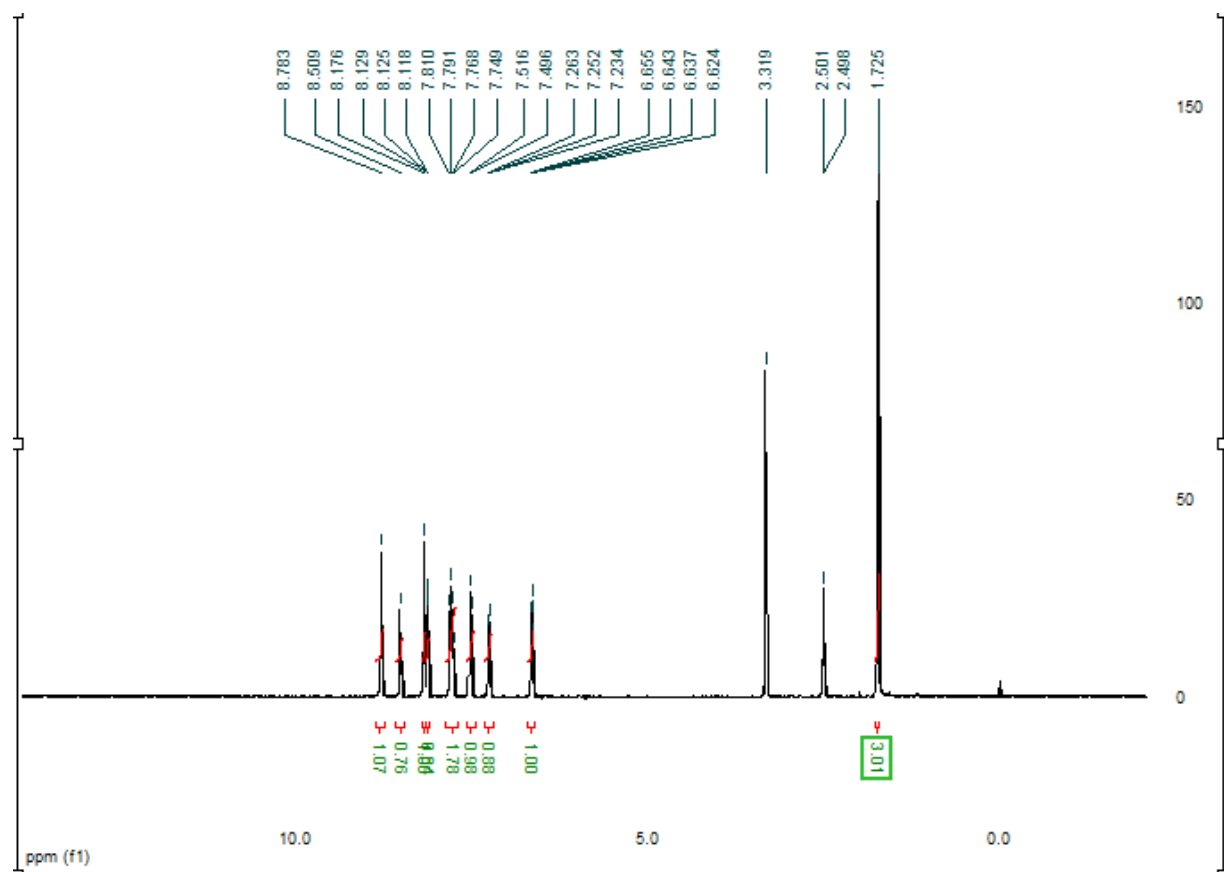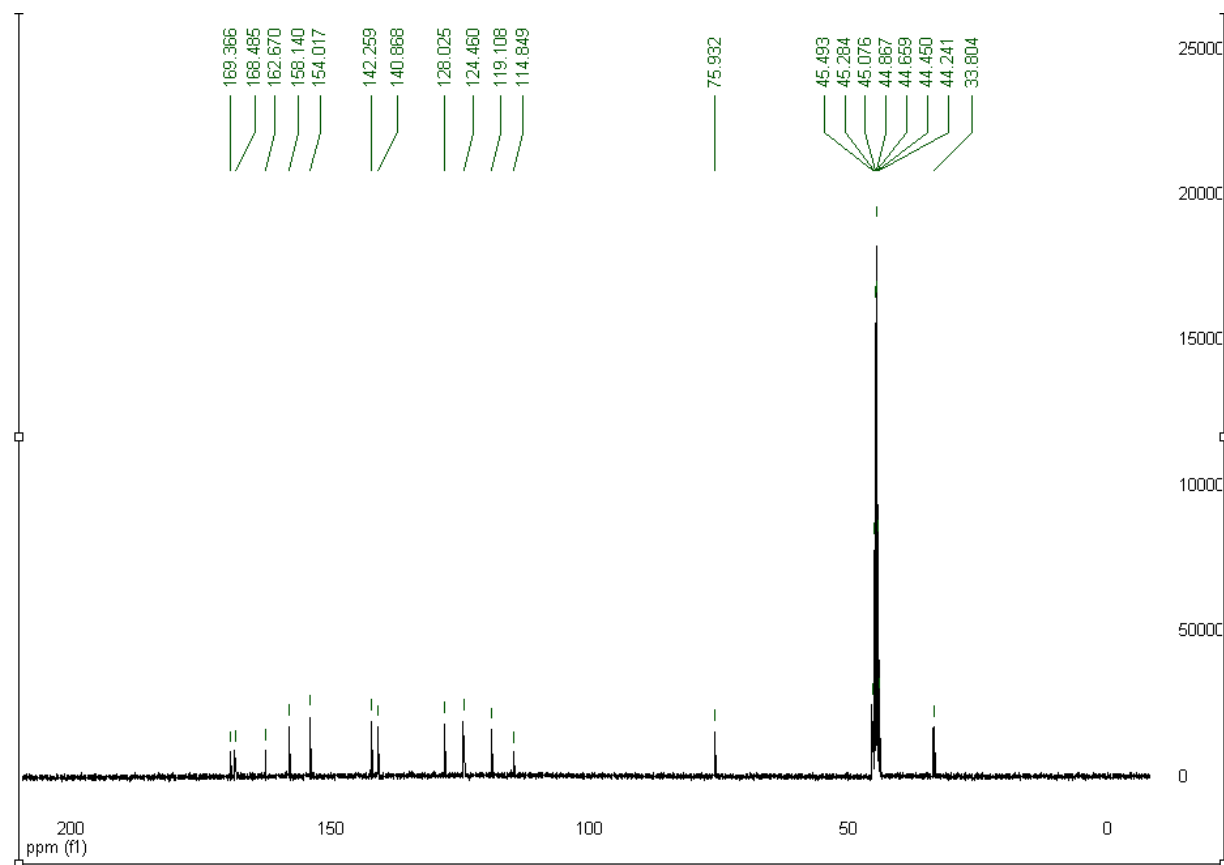

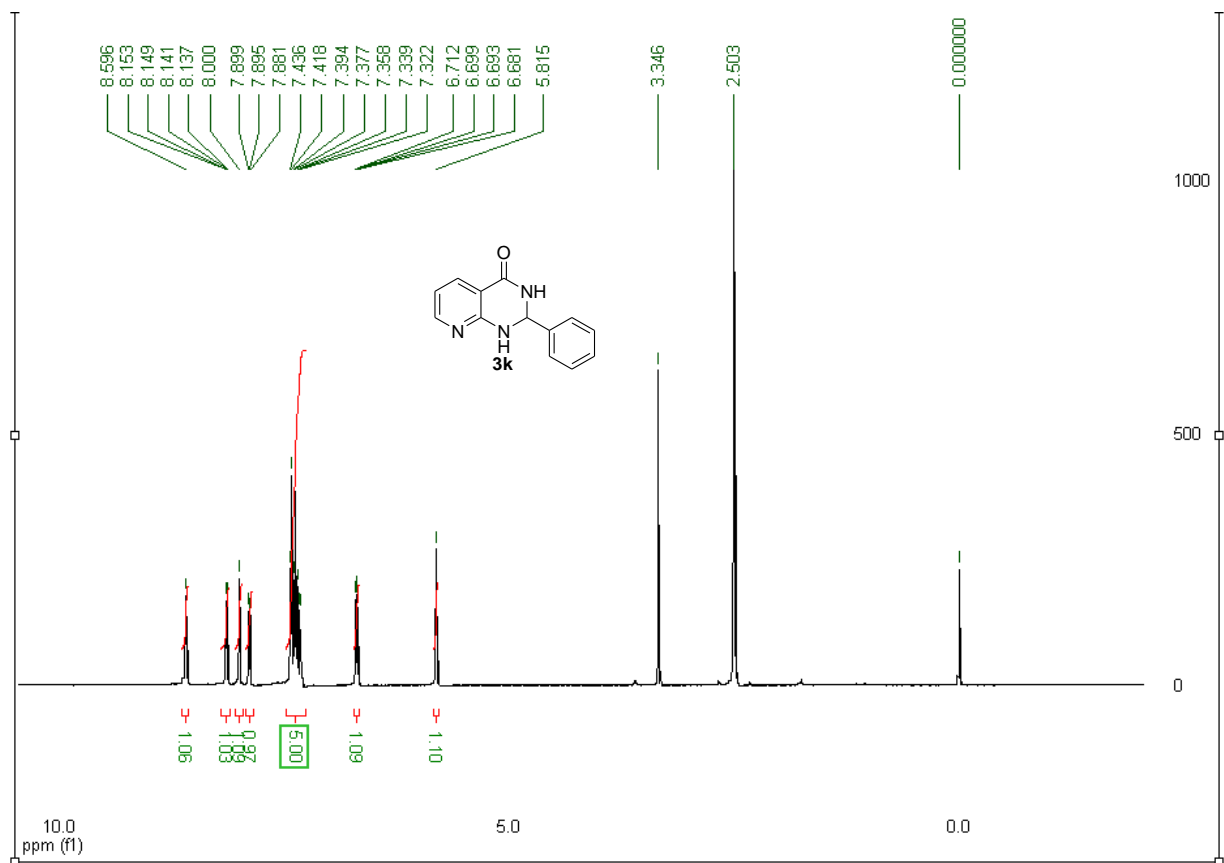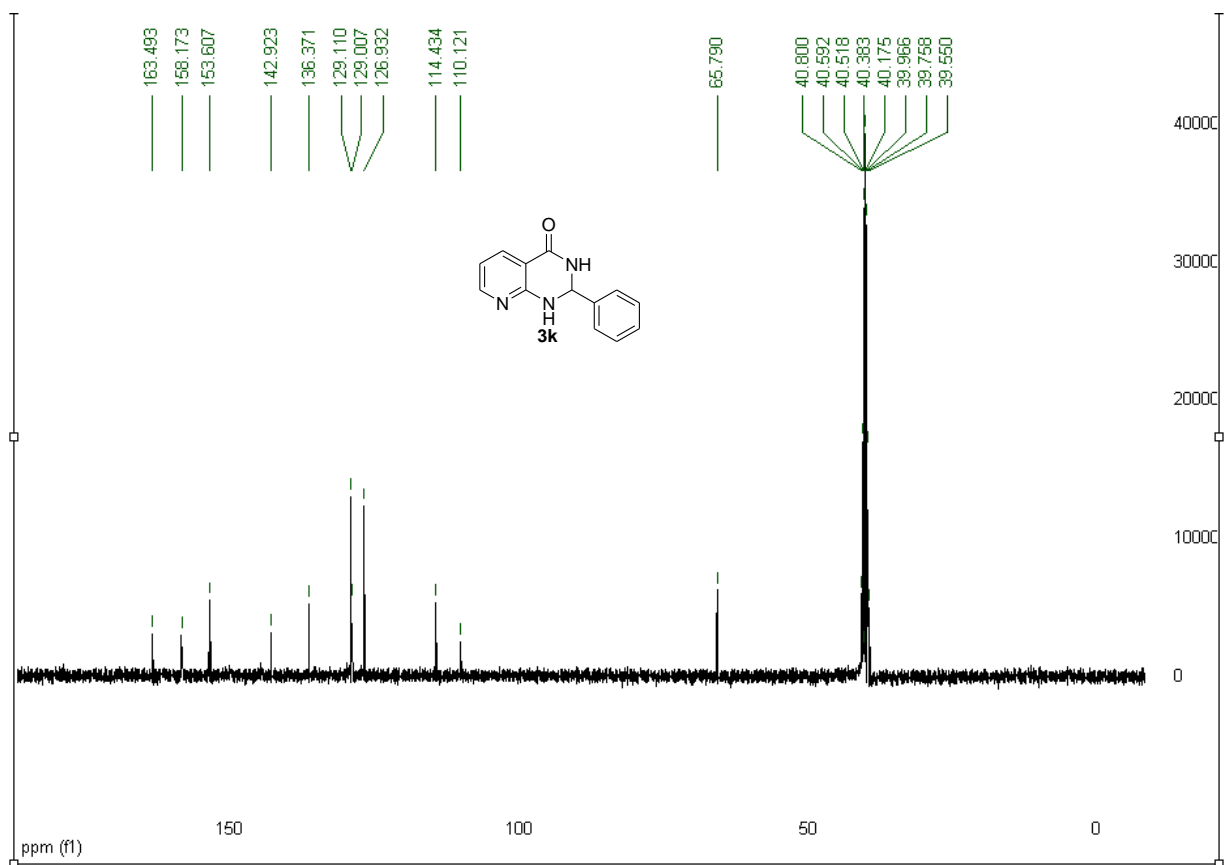

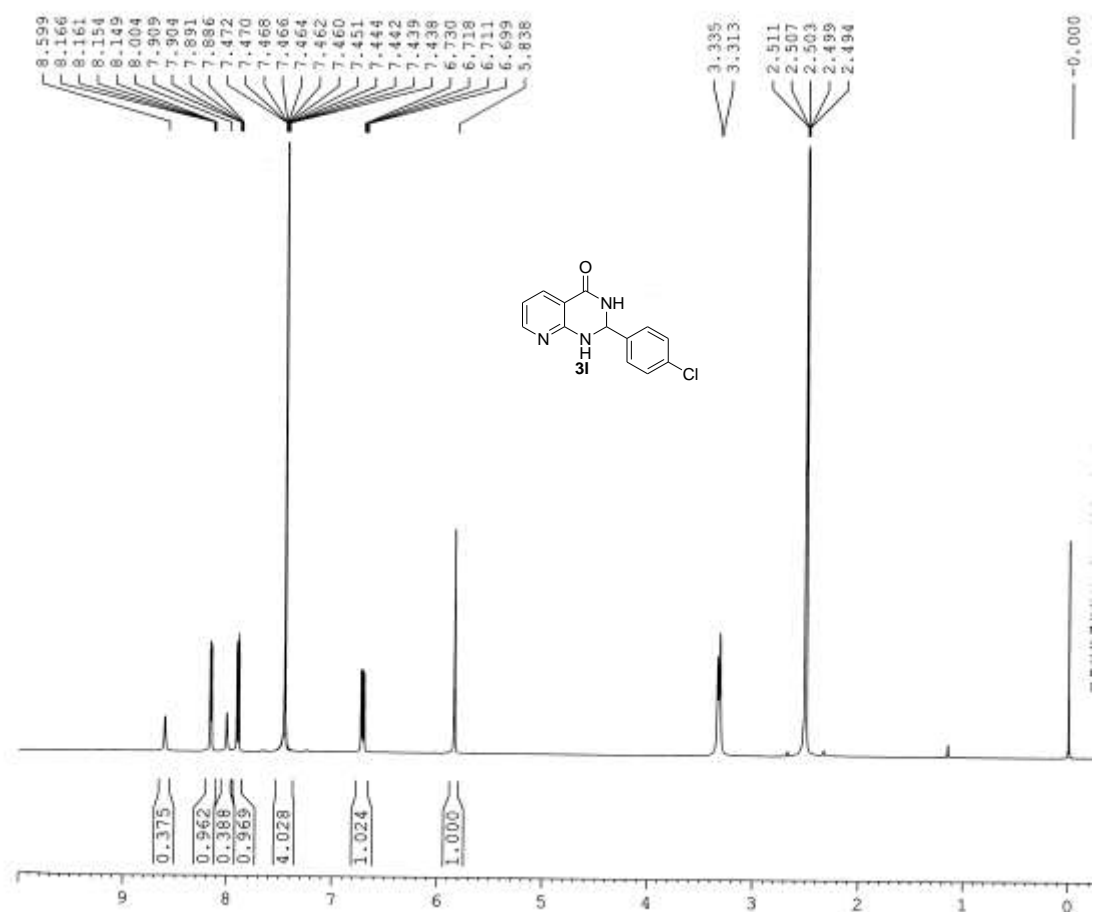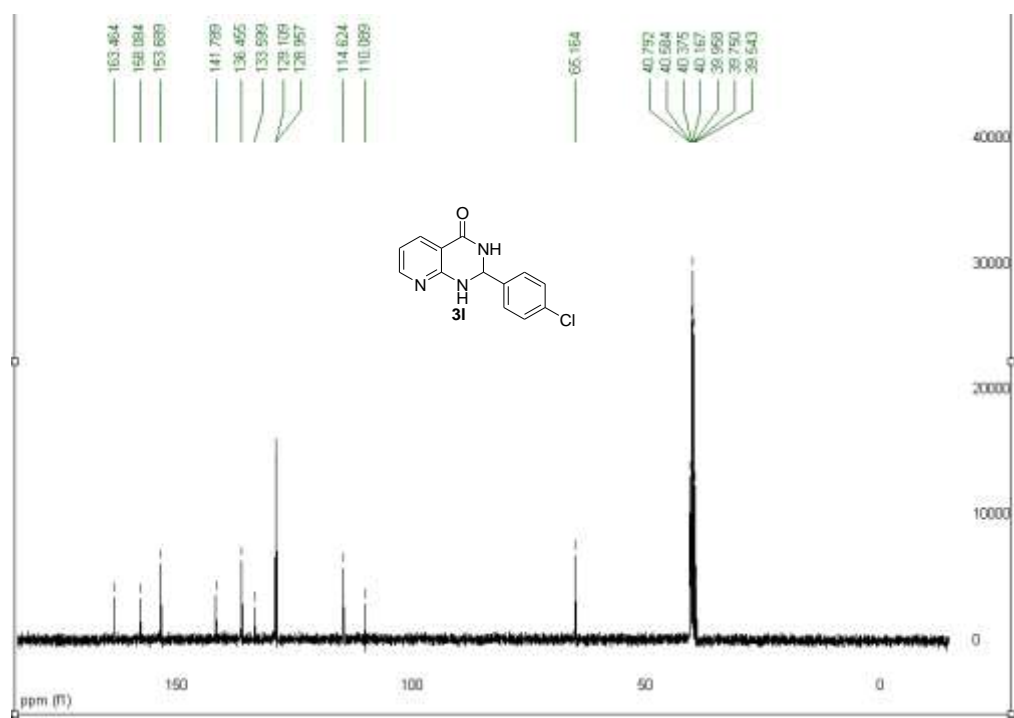

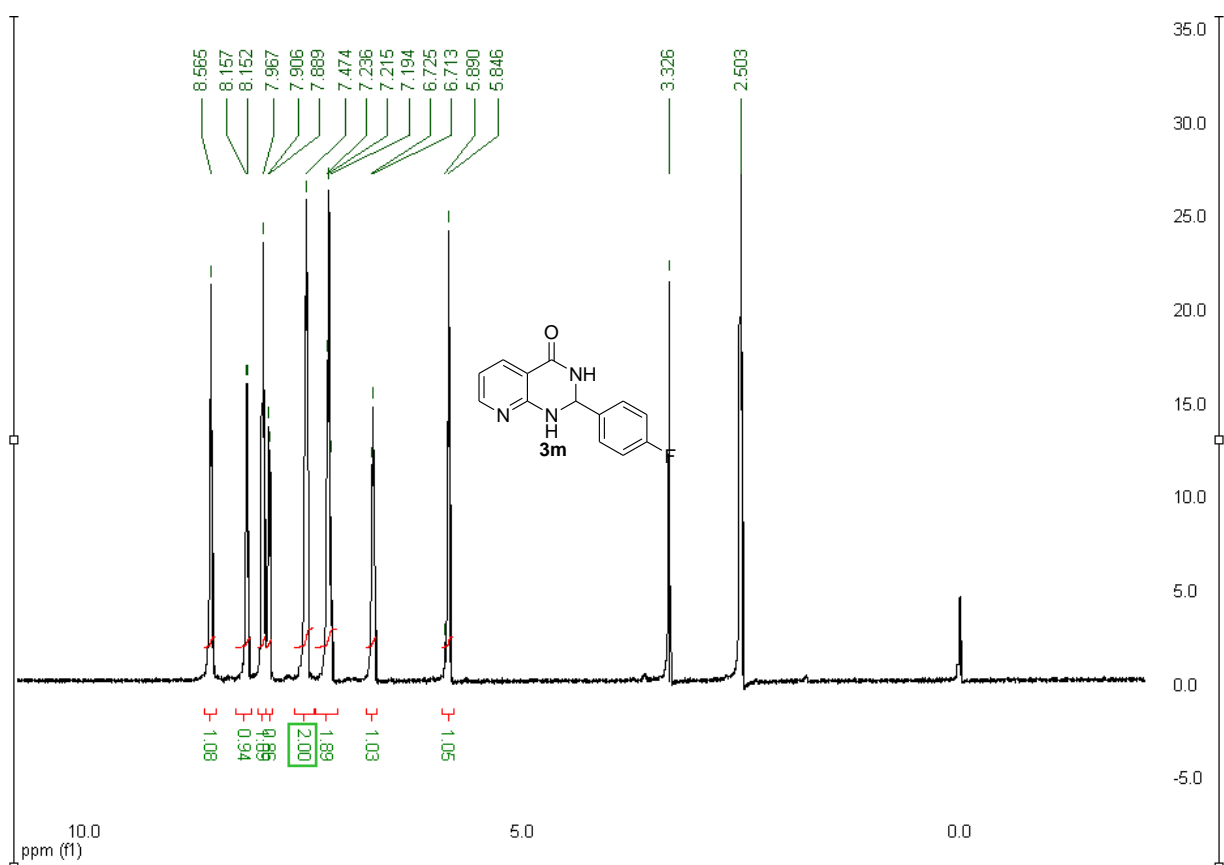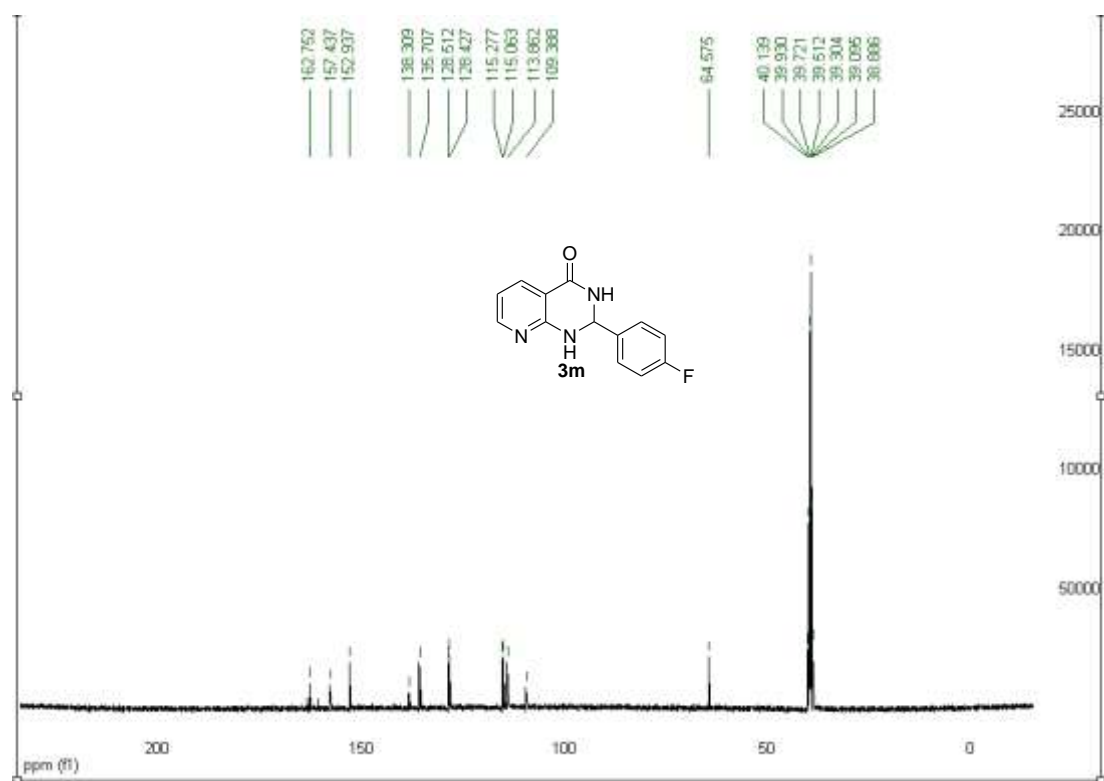

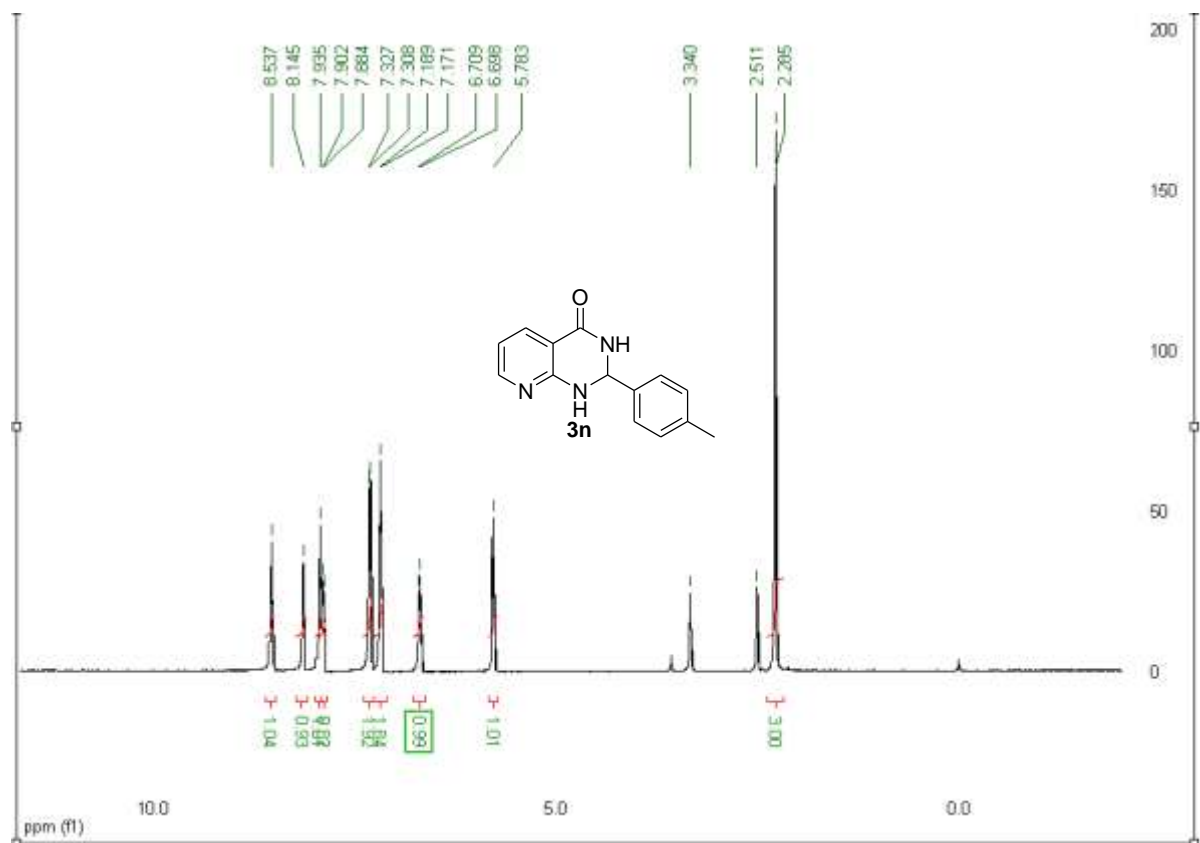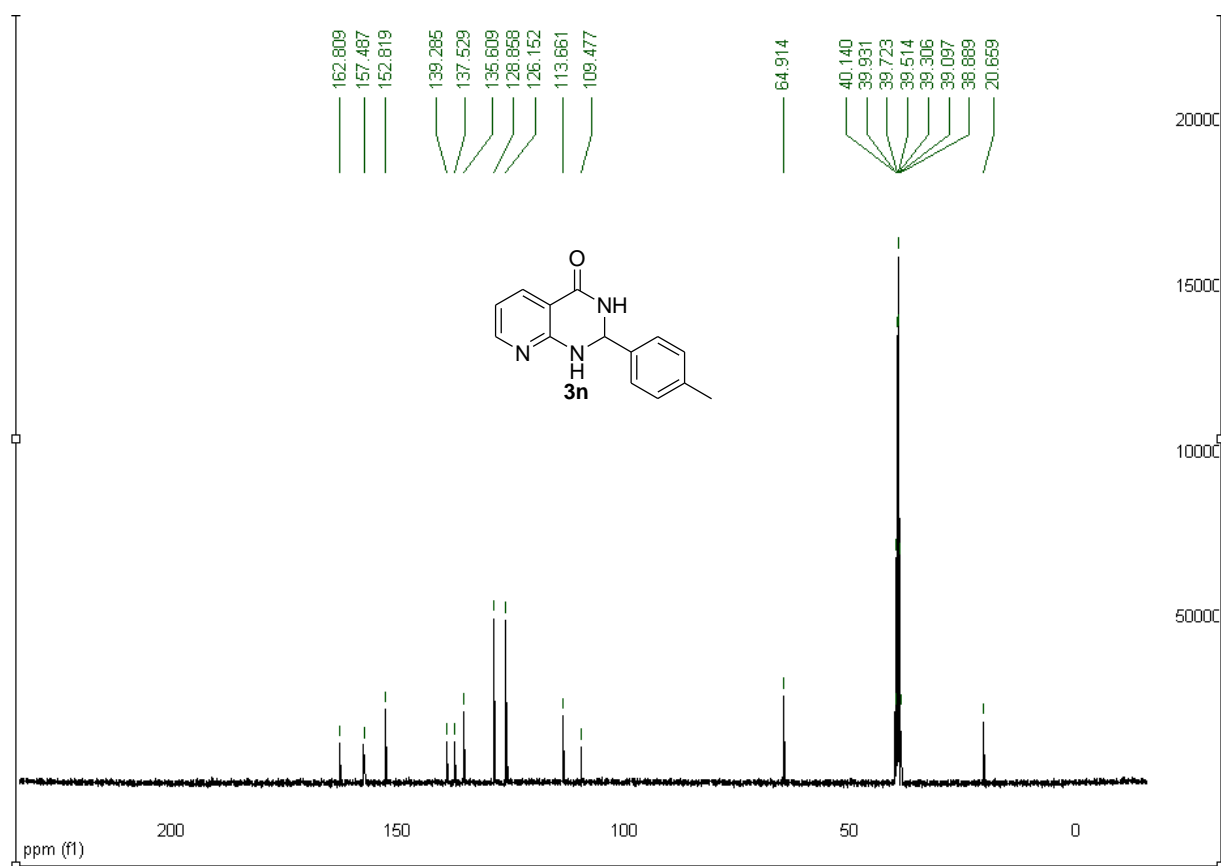



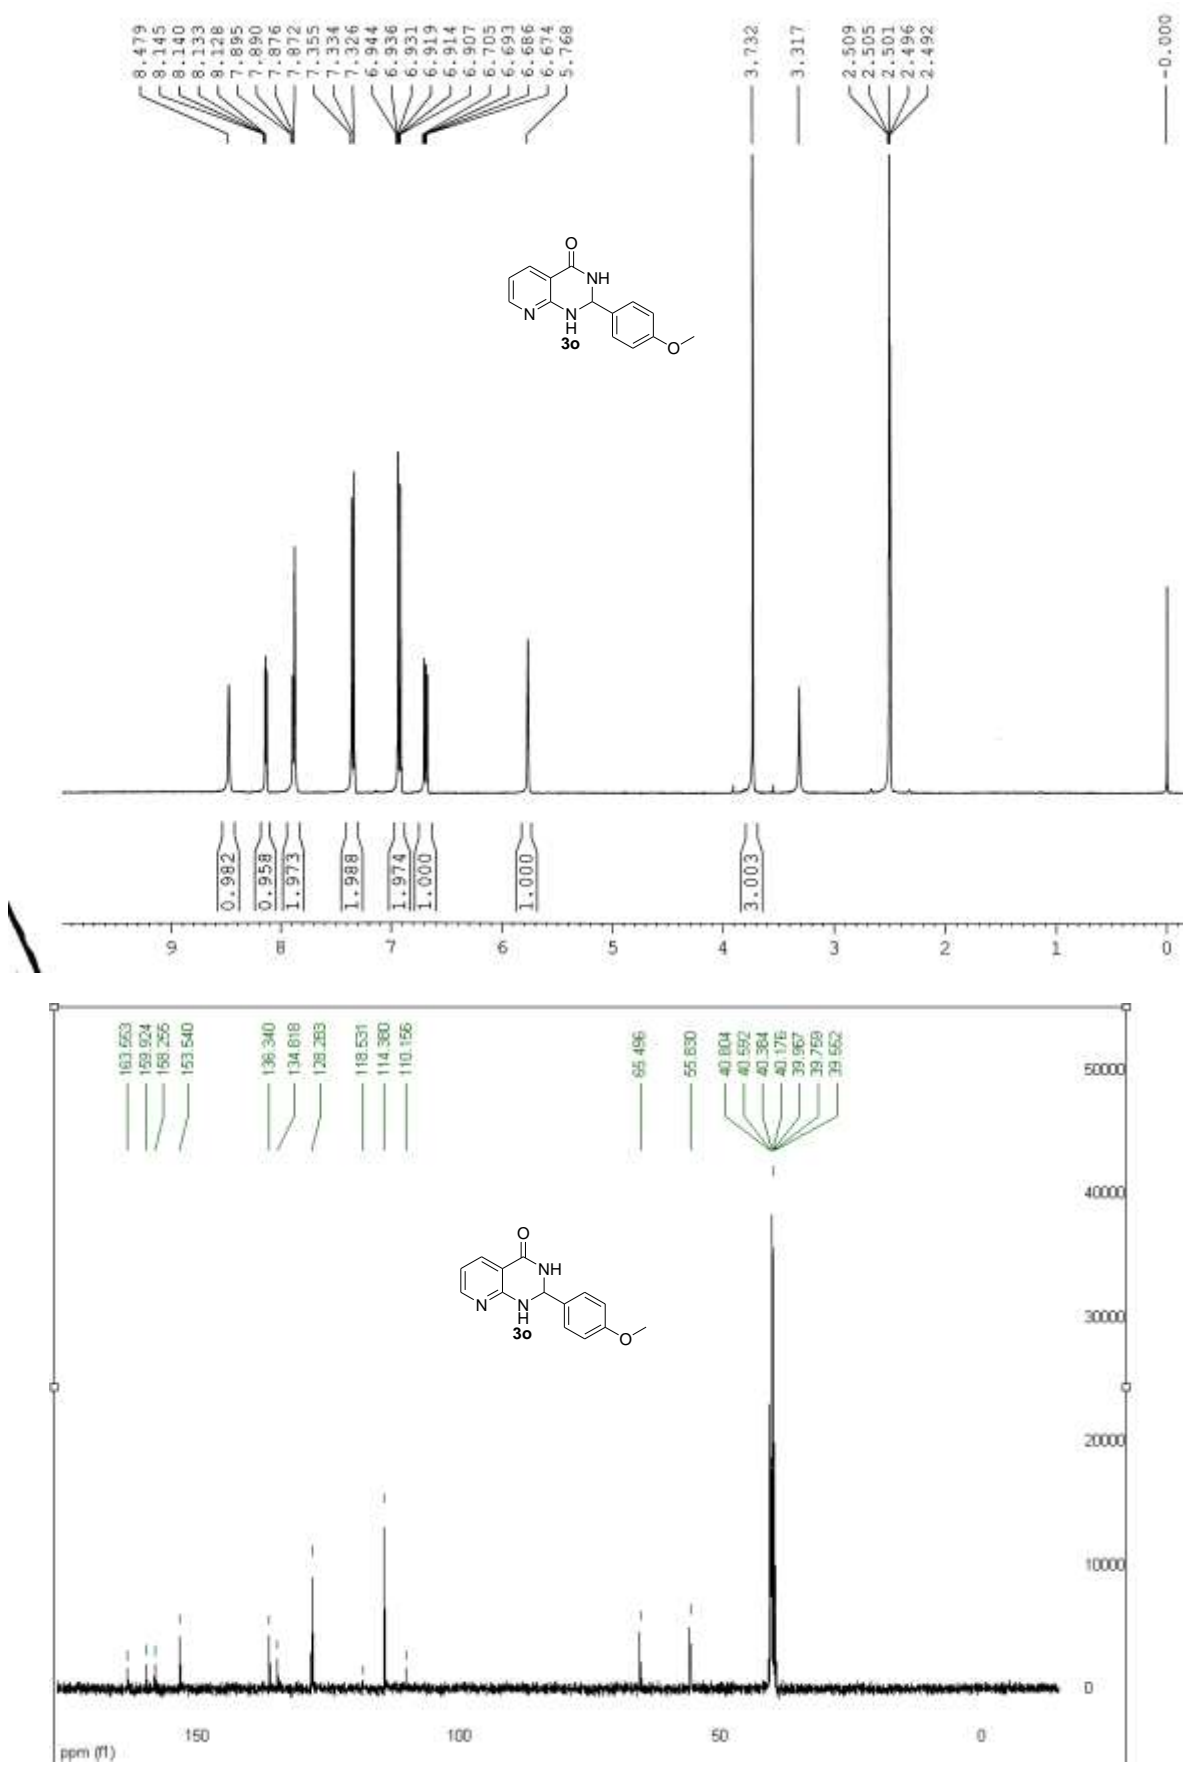

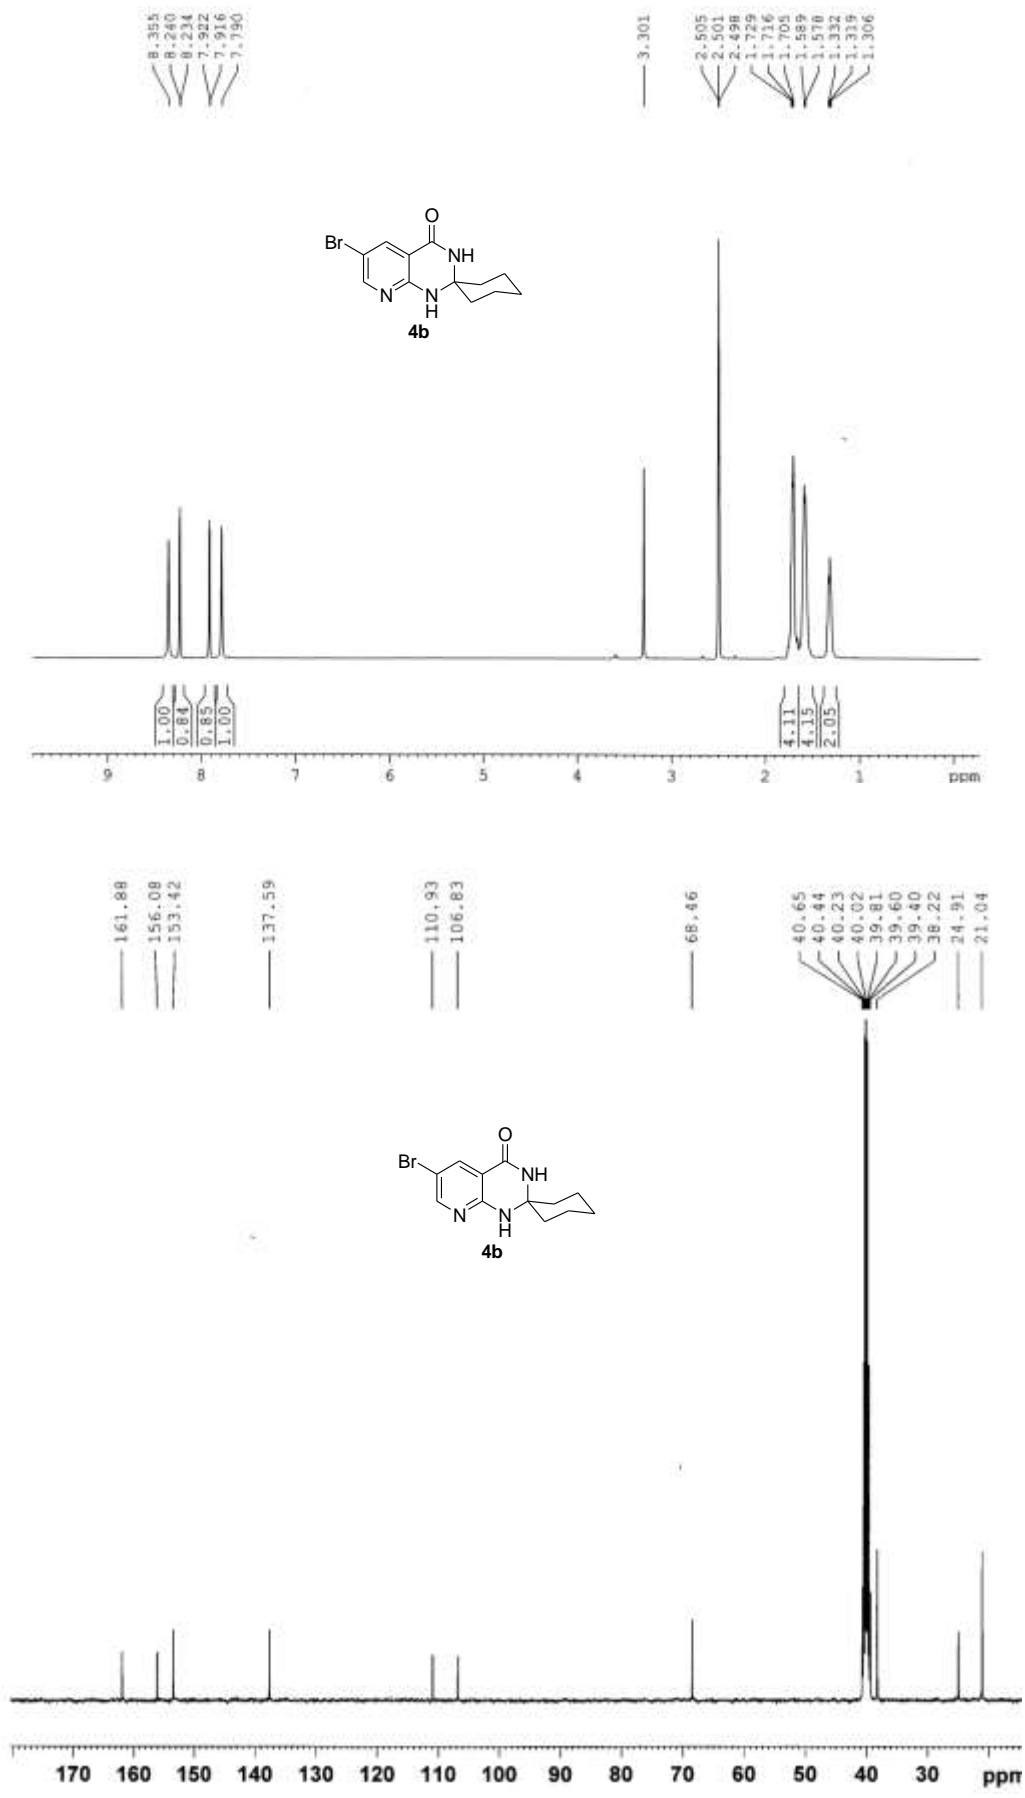

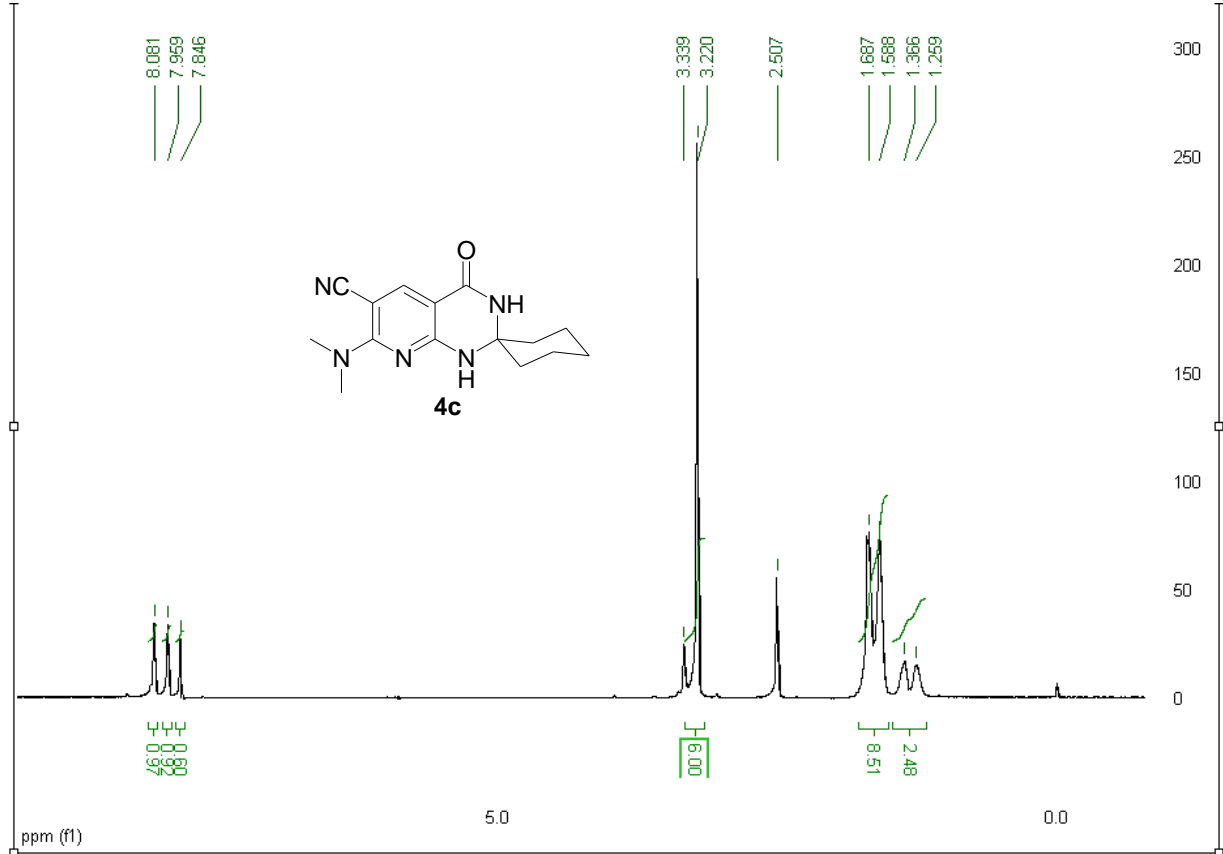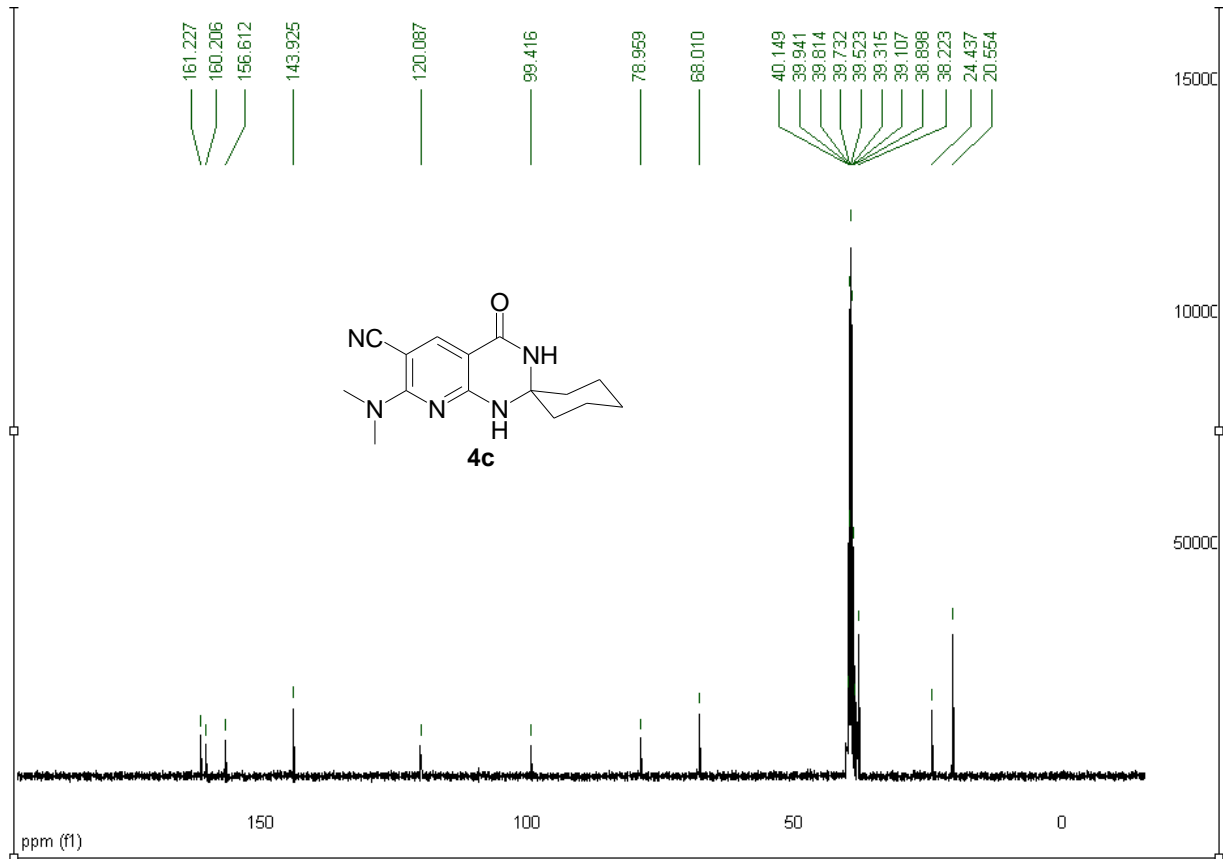

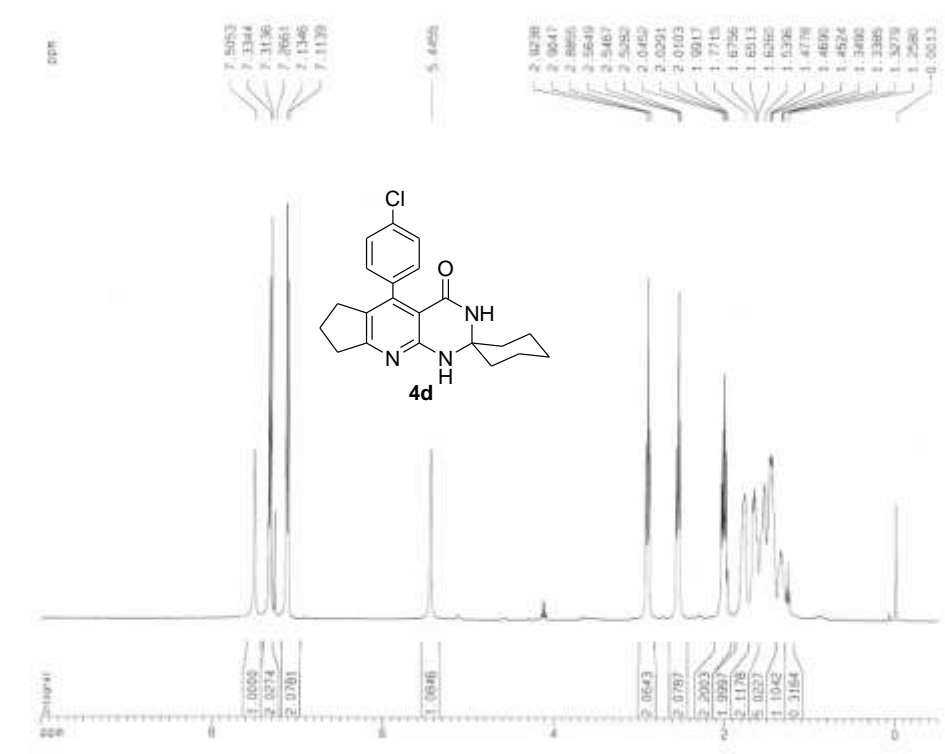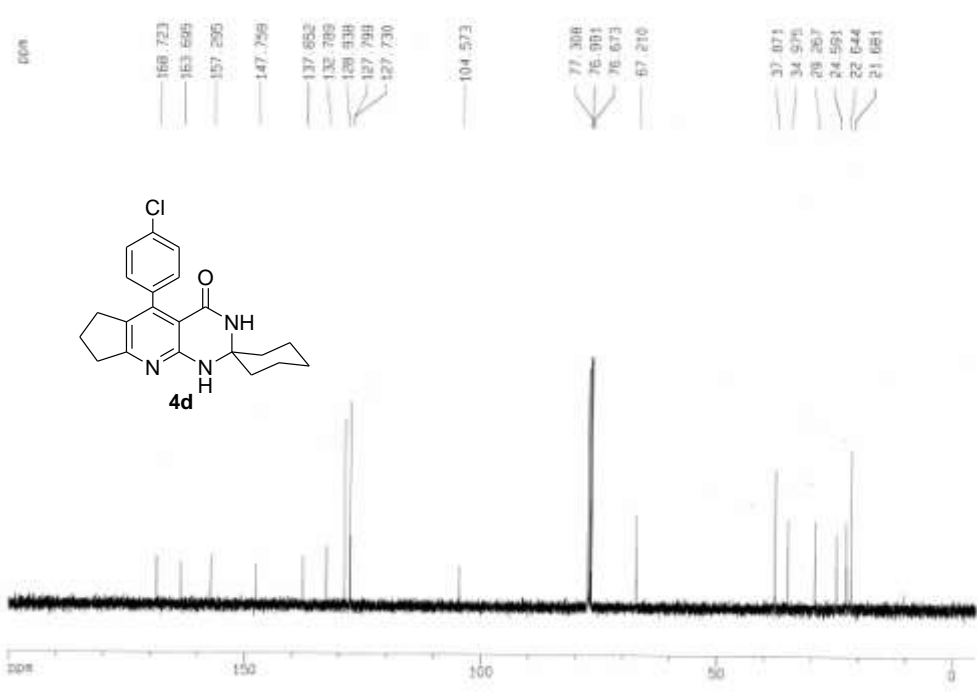

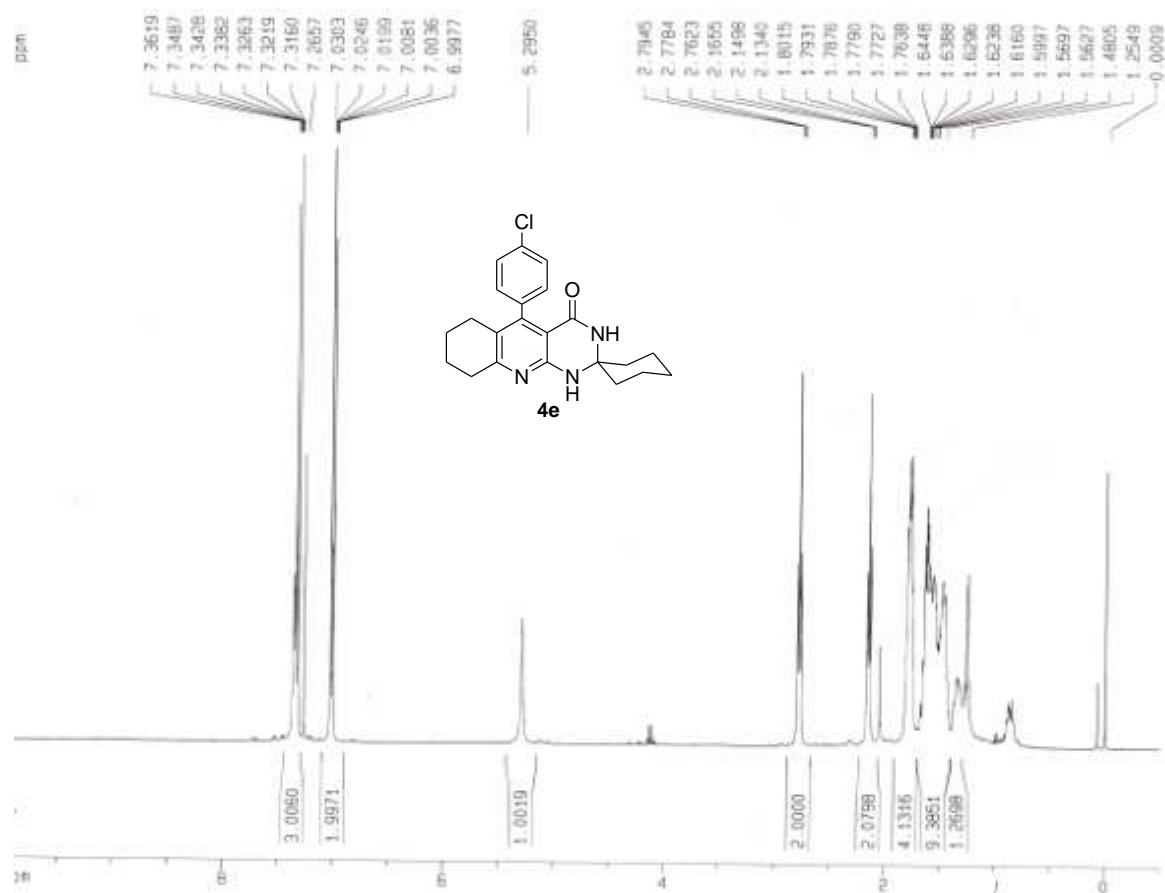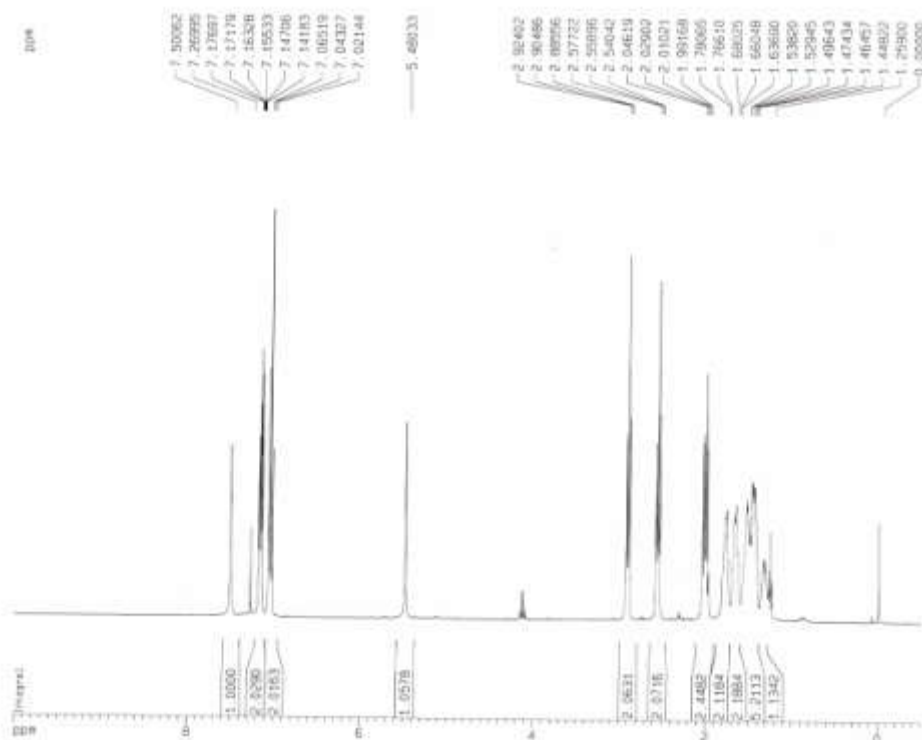

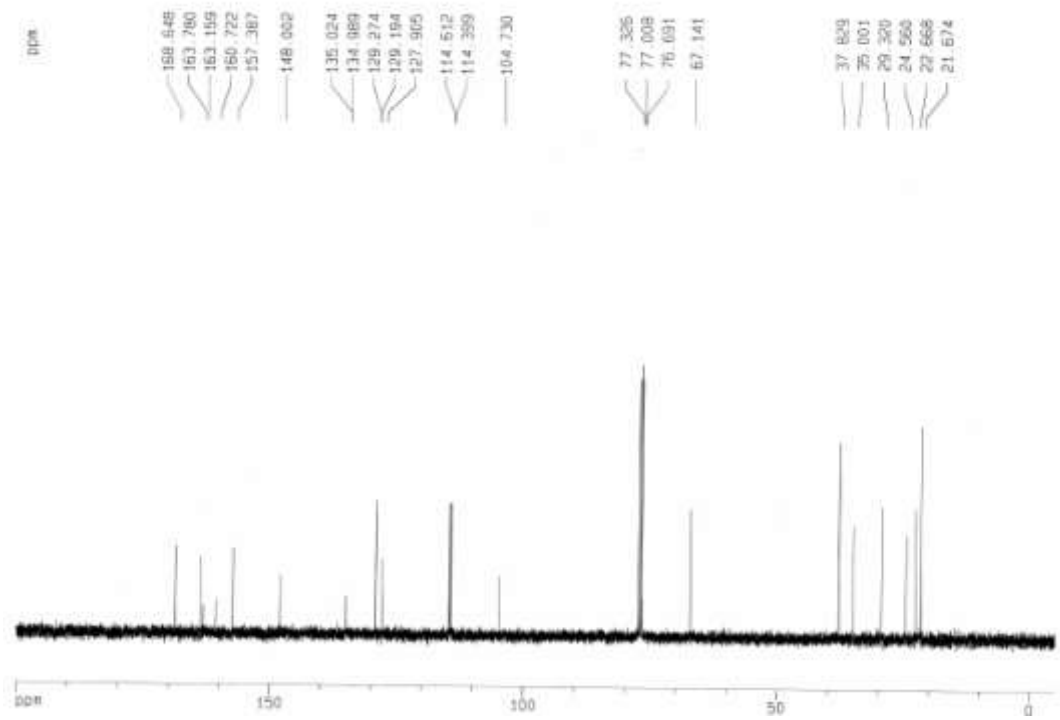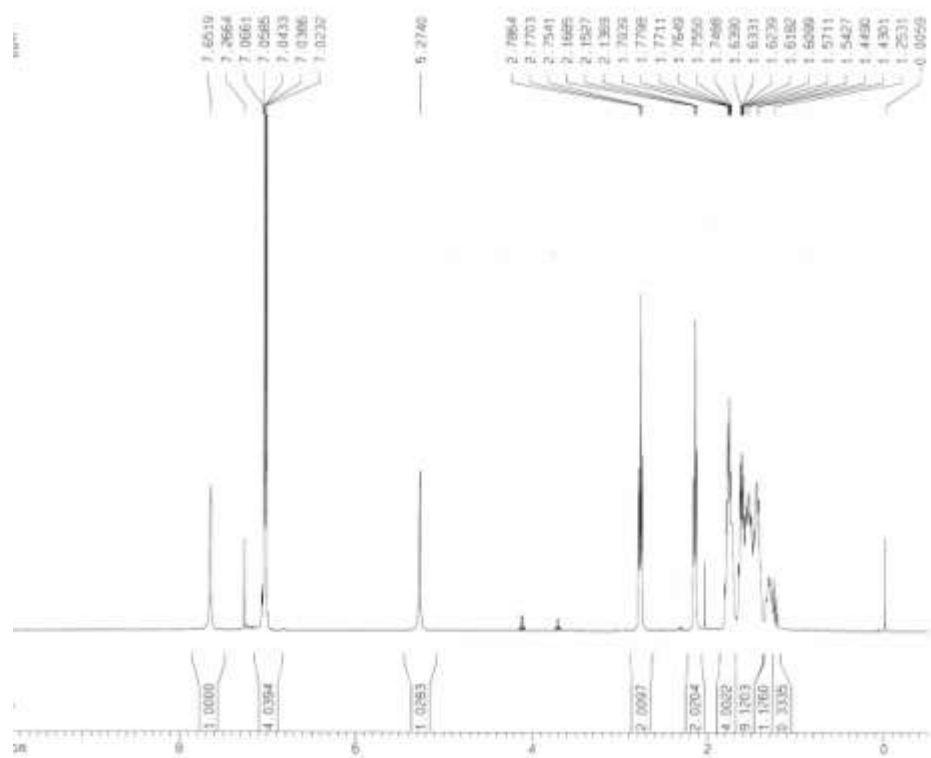

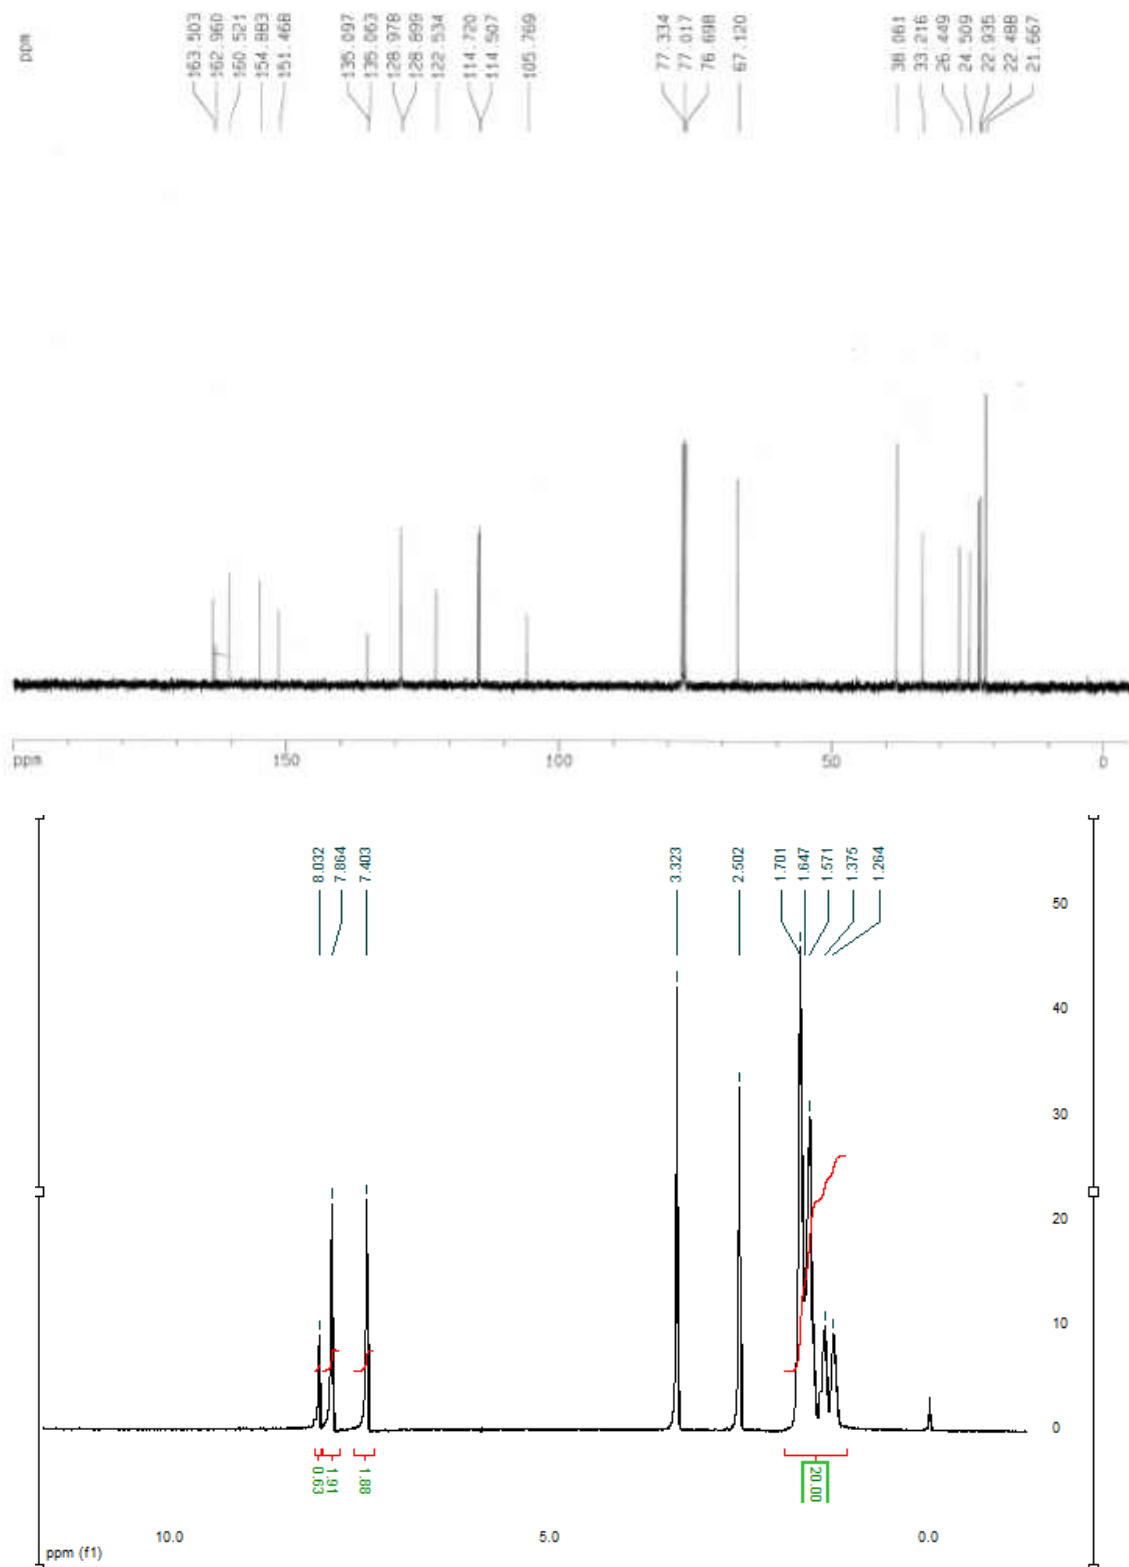

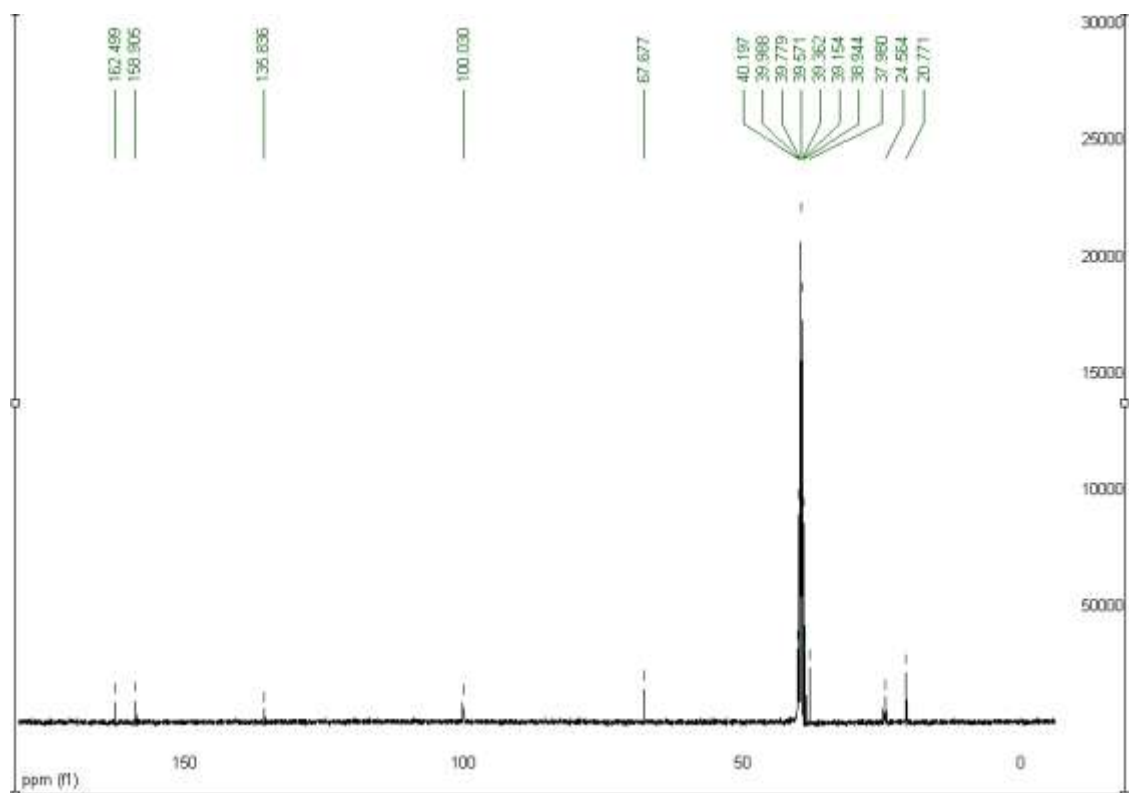

Supplement: c2gc16469h.pdf [file c2gc16469h.pdf]
